# Supplementary material for: Low LDL cholesterol, PCSK9 and HMGCR genetic variation, and risk of Alzheimer’s disease and Parkinson’s disease: Mendelian randomisation study
Source: PubMed Central journal article supplement — BMJ. 2017 Apr 24;357:j1648. doi: 10.1136/bmj.j1648 (PMC5421439; doi:10.1136/bmj.j1648), 2017-04-24
Supplement: benm033277.ww1.pdf [file benm033277.ww1.pdf]

## Supplementary Table 1

Information on genetic variants in *PCSK9* (chromosome 1) and *HMGCR* (chromosome 5) used in the two sample Mendelian randomisation study on low LDL-cholesterol and risk of Alzheimer's dementia.

| SNP ID     | Chr | Position | Global Lipid Genetics Consortium (GLGC)<br>Results for regression of LDL-cholesterol on genotype |                  |         |        |         | International Genomics of Alzheimer's<br>Project (IGAP)<br>Risk of Alzheimer's dementia |         |
|------------|-----|----------|--------------------------------------------------------------------------------------------------|------------------|---------|--------|---------|-----------------------------------------------------------------------------------------|---------|
|            |     |          | MAF<br>1000G<br>CEU                                                                              | Effect<br>allele | $\beta$ | SE     | P-value | Odds ratio (95% CI)                                                                     | P-value |
| rs12563214 | 1   | 55042648 | 0.07                                                                                             | T                | -0.0066 | 0.0104 | 0.5277  | 1.01 (0.95-1.08)                                                                        | 0.748   |
| rs1755588  | 1   | 55044940 | 0.02                                                                                             | T                | -0.0086 | 0.0195 | 0.671   | 0.91 (0.81-1.03)                                                                        | 0.137   |
| rs1655527  | 1   | 55045039 | 0.05                                                                                             | A                | -0.0032 | 0.0199 | 0.8175  | 0.92 (0.82-1.04)                                                                        | 0.174   |
| rs300273   | 1   | 55045930 | 0.62                                                                                             | A                | -0.0002 | 0.0055 | 0.9521  | 1.02 (0.99-1.05)                                                                        | 0.218   |
| rs300272   | 1   | 55045983 | 0.38                                                                                             | A                | -0.0059 | 0.0182 | 0.6222  | 1.02 (0.99-1.05)                                                                        | 0.274   |
| rs300271   | 1   | 55046039 | 0.69                                                                                             | T                | -0.0008 | 0.0057 | 0.7966  | 1.01 (0.98-1.05)                                                                        | 0.443   |
| rs300269   | 1   | 55046392 | 0.54                                                                                             | A                | -0.0025 | 0.0053 | 0.6988  | 1.01 (0.98-1.04)                                                                        | 0.428   |
| rs300267   | 1   | 55046535 | 0.61                                                                                             | T                | -0.001  | 0.0054 | 0.9154  | 1.02 (0.99-1.05)                                                                        | 0.269   |
| rs7531575  | 1   | 55047724 | 0.11                                                                                             | A                | -0.0089 | 0.0107 | 0.4364  | 1.01 (0.95-1.08)                                                                        | 0.685   |
| rs12563368 | 1   | 55048098 | 0.98                                                                                             | C                | -0.0027 | 0.0175 | 0.8902  | 1.03 (0.94-1.14)                                                                        | 0.521   |
| rs17110749 | 1   | 55048190 | 0.11                                                                                             | A                | -0.006  | 0.0113 | 0.6936  | 1.01 (0.95-1.08)                                                                        | 0.719   |
| rs12408715 | 1   | 55048942 | 0.10                                                                                             | C                | -0.0044 | 0.0109 | 0.7728  | 1.02 (0.95-1.08)                                                                        | 0.634   |
| rs7519073  | 1   | 55050632 | 0.07                                                                                             | T                | -0.0059 | 0.0111 | 0.641   | 1.01 (0.94-1.08)                                                                        | 0.745   |
| rs2304309  | 1   | 55051899 | 0.98                                                                                             | A                | -0.0142 | 0.0171 | 0.6562  | 0.94 (0.85-1.04)                                                                        | 0.250   |
| rs573522   | 1   | 55052031 | 0.54                                                                                             | A                | -0.0047 | 0.0056 | 0.4488  | 1.02 (0.99-1.05)                                                                        | 0.248   |
| rs573411   | 1   | 55052071 | 0.53                                                                                             | A                | -0.0029 | 0.0056 | 0.6538  | 1.02 (0.99-1.05)                                                                        | 0.252   |
| rs2304308  | 1   | 55057958 | 0.13                                                                                             | A                | -0.0096 | 0.0264 | 0.6852  | 1.03 (0.93-1.13)                                                                        | 0.609   |
| rs1172779  | 1   | 55059295 | 0.20                                                                                             | A                | -0.0077 | 0.0248 | 0.723   | 1.04 (0.94-1.14)                                                                        | 0.488   |
| rs1702003  | 1   | 55060362 | 0.14                                                                                             | A                | -0.0096 | 0.022  | 0.6135  | 1.04 (0.93-1.16)                                                                        | 0.476   |

|            |   |          |      |   |         |        |        |                  |       |
|------------|---|----------|------|---|---------|--------|--------|------------------|-------|
| rs1702002  | 1 | 55060548 | 0.03 | T | -0.0103 | 0.0215 | 0.6056 | 1.03 (0.93-1.13) | 0.593 |
| rs2455419  | 5 | 75338896 | 0.55 | C | -0.0068 | 0.0052 | 0.2952 | 1.02 (0.99-1.05) | 0.272 |
| rs10042012 | 5 | 75339699 | 0.17 | T | -0.0008 | 0.0067 | 0.7657 | 1.01 (0.97-1.05) | 0.700 |
| rs10059544 | 5 | 75342023 | 0.19 | C | -0.001  | 0.0067 | 0.7557 | 1.01 (0.97-1.05) | 0.681 |
| rs2652601  | 5 | 75342509 | 0.54 | T | -0.0069 | 0.0052 | 0.2871 | 0.98 (0.95-1.01) | 0.258 |
| rs6453196  | 5 | 75343354 | 0.94 | T | -0.0222 | 0.019  | 0.4092 | 1.00 (0.91-1.10) | 0.976 |
| rs6453197  | 5 | 75343373 | 0.97 | A | -0.0214 | 0.019  | 0.4199 | 0.99 (0.90-1.09) | 0.810 |

Chr=Chromosome, MAF 1000G CEU=minor allele frequency for the central European population (CEU) in the 1000 Genome database.

SE=Standard error.

## Supplementary Table 2

Information on genetic variants used in the overall two sample Mendelian randomisation study on low LDL-cholesterol on risk of Alzheimer's dementia.

Genetic variants were not selected by pathway, but by p-value for effect on LDL-cholesterol. Genetic variants in APOE were excluded.

| SNP ID     | Chr | Position | Global Lipid Genetics Consortium (GLGC)<br>Results for regression of LDL-cholesterol on genotype |                  |         |       |           | International Genomics of Alzheimer's<br>Project (IGAP)<br>Risk of Alzheimer's dementia |         |
|------------|-----|----------|--------------------------------------------------------------------------------------------------|------------------|---------|-------|-----------|-----------------------------------------------------------------------------------------|---------|
|            |     |          | MAF<br>1000G<br>CEU                                                                              | Effect<br>allele | $\beta$ | SE    | P-value   | Odds ratio (95% CI)                                                                     | P-value |
| rs7541095  | 1   | 25761291 | 0.47                                                                                             | T                | -0.0324 | 0.005 | 3.095E-10 | 0.99 (0.96-1.02)                                                                        | 0.518   |
| rs2479394  | 1   | 55486064 | 0.71                                                                                             | A                | -0.0343 | 0.006 | 8.498E-10 | 0.99 (0.95-1.02)                                                                        | 0.393   |
| rs9436961  | 1   | 55488831 | 0.73                                                                                             | A                | -0.0415 | 0.006 | 1.119E-12 | 1.02 (0.98-1.05)                                                                        | 0.354   |
| rs2479415  | 1   | 55498745 | 0.57                                                                                             | T                | -0.0460 | 0.006 | 2.082E-13 | 0.96 (0.93-1.00)                                                                        | 0.030   |
| rs2149041  | 1   | 55502137 | 0.83                                                                                             | C                | -0.0702 | 0.007 | 2.49E-24  | 1.01 (0.97-1.05)                                                                        | 0.618   |
| rs17111503 | 1   | 55503448 | 0.79                                                                                             | A                | -0.0725 | 0.007 | 3.259E-27 | 0.99 (0.95-1.02)                                                                        | 0.481   |
| rs2479409  | 1   | 55504650 | 0.70                                                                                             | A                | -0.0671 | 0.006 | 1.931E-28 | 0.98 (0.94-1.01)                                                                        | 0.221   |
| rs11583680 | 1   | 55505668 | 0.14                                                                                             | T                | -0.0521 | 0.010 | 8.976E-09 | 1.01 (0.96-1.05)                                                                        | 0.826   |
| rs10888897 | 1   | 55513061 | 0.40                                                                                             | T                | -0.0433 | 0.007 | 4.643E-11 | 1.02 (0.99-1.06)                                                                        | 0.209   |
| rs557435   | 1   | 55520864 | 0.19                                                                                             | A                | -0.0604 | 0.007 | 9.592E-16 | 1.04 (1.00-1.08)                                                                        | 0.070   |
| rs602705   | 1   | 55525726 | 0.17                                                                                             | T                | -0.0511 | 0.007 | 4.163E-13 | 1.05 (1.01-1.10)                                                                        | 0.010   |
| rs505151   | 1   | 55529187 | 0.96                                                                                             | A                | -0.0973 | 0.014 | 2.422E-12 | 0.95 (0.87-1.04)                                                                        | 0.254   |
| rs1475701  | 1   | 55638546 | 0.92                                                                                             | T                | -0.0992 | 0.014 | 1.855E-13 | 0.96 (0.88-1.04)                                                                        | 0.334   |
| rs287227   | 1   | 55656075 | 0.12                                                                                             | T                | -0.0753 | 0.008 | 2.067E-22 | 1.04 (1.00-1.09)                                                                        | 0.063   |
| rs4926670  | 1   | 55662680 | 0.08                                                                                             | T                | -0.0785 | 0.009 | 9.421E-18 | 1.05 (0.99-1.11)                                                                        | 0.102   |
| rs2047422  | 1   | 55711967 | 0.39                                                                                             | A                | -0.0418 | 0.005 | 4.474E-14 | 1.03 (1.00-1.06)                                                                        | 0.054   |
| rs4927207  | 1   | 55713628 | 0.16                                                                                             | A                | -0.0676 | 0.007 | 7.734E-20 | 1.02 (0.98-1.07)                                                                        | 0.308   |
| rs2647286  | 1   | 55716497 | 0.20                                                                                             | A                | -0.0515 | 0.007 | 2.053E-14 | 1.01 (0.97-1.05)                                                                        | 0.534   |

|            |   |           |      |   |         |       |           |                  |       |
|------------|---|-----------|------|---|---------|-------|-----------|------------------|-------|
| rs6662286  | 1 | 55730327  | 0.06 | T | -0.0993 | 0.013 | 1.437E-14 | 1.04 (0.98-1.11) | 0.223 |
| rs1874775  | 1 | 55743330  | 0.25 | A | -0.0396 | 0.006 | 8.926E-11 | 0.99 (0.96-1.03) | 0.726 |
| rs4927216  | 1 | 55744920  | 0.23 | T | -0.0404 | 0.006 | 3.866E-11 | 0.99 (0.96-1.03) | 0.671 |
| rs10493322 | 1 | 62905893  | 0.34 | T | -0.0489 | 0.006 | 2.97E-17  | 1.03 (1.00-1.07) | 0.051 |
| rs12092541 | 1 | 62917913  | 0.18 | A | -0.0448 | 0.007 | 1.135E-09 | 1.03 (0.98-1.07) | 0.235 |
| rs7555577  | 1 | 63034363  | 0.32 | A | -0.0490 | 0.006 | 1.939E-17 | 1.03 (1.00-1.07) | 0.041 |
| rs12042319 | 1 | 63049819  | 0.35 | A | -0.0494 | 0.005 | 3.469E-18 | 1.04 (1.00-1.07) | 0.035 |
| rs11207997 | 1 | 63061906  | 0.33 | T | -0.0486 | 0.006 | 1.428E-17 | 1.03 (0.99-1.06) | 0.113 |
| rs2031373  | 1 | 63083289  | 0.58 | A | -0.0332 | 0.005 | 3.529E-08 | 1.02 (0.99-1.05) | 0.282 |
| rs1168085  | 1 | 63112320  | 0.31 | C | -0.0488 | 0.006 | 5.17E-17  | 1.03 (1.00-1.07) | 0.038 |
| rs1168086  | 1 | 63112389  | 0.37 | A | -0.0476 | 0.005 | 3.39E-17  | 1.03 (1.00-1.07) | 0.039 |
| rs1168089  | 1 | 63113719  | 0.36 | T | -0.0481 | 0.005 | 2.742E-17 | 1.03 (0.99-1.06) | 0.111 |
| rs912540   | 1 | 63135127  | 0.22 | A | -0.0415 | 0.007 | 2.225E-10 | 1.03 (0.99-1.07) | 0.097 |
| rs12130333 | 1 | 63191777  | 0.21 | T | -0.0394 | 0.007 | 1.166E-09 | 1.03 (0.99-1.07) | 0.206 |
| rs1337247  | 1 | 109703023 | 0.13 | A | -0.0676 | 0.010 | 1.421E-11 | 1.03 (0.97-1.08) | 0.345 |
| rs676385   | 1 | 109705022 | 0.26 | A | -0.0373 | 0.007 | 3E-09     | 0.97 (0.94-1.01) | 0.127 |
| rs648673   | 1 | 109727284 | 0.15 | C | -0.0584 | 0.008 | 1.239E-13 | 1.01 (0.96-1.06) | 0.675 |
| rs611060   | 1 | 109782190 | 0.42 | T | -0.0524 | 0.005 | 5.905E-23 | 1.02 (0.99-1.06) | 0.173 |
| rs454107   | 1 | 109794252 | 0.03 | T | -0.0974 | 0.014 | 1.7E-11   | 1.00 (0.92-1.09) | 0.947 |
| rs17035665 | 1 | 109813719 | 0.17 | T | -0.0898 | 0.008 | 2.308E-29 | 1.01 (0.96-1.05) | 0.740 |
| rs4970834  | 1 | 109814880 | 0.18 | T | -0.1618 | 0.007 | 0         | 0.99 (0.96-1.04) | 0.787 |
| rs660240   | 1 | 109817838 | 0.21 | T | -0.1731 | 0.006 | 0         | 1.00 (0.96-1.03) | 0.823 |
| rs602633   | 1 | 109821511 | 0.22 | T | -0.1709 | 0.006 | 0         | 1.00 (0.96-1.04) | 0.854 |
| rs655246   | 1 | 109832283 | 0.48 | A | -0.0578 | 0.006 | 1.282E-26 | 1.01 (0.98-1.04) | 0.672 |
| rs17584208 | 1 | 109833187 | 0.11 | A | -0.1098 | 0.010 | 7.727E-28 | 1.00 (0.95-1.06) | 0.942 |
| rs17645031 | 1 | 109834938 | 0.09 | T | -0.1089 | 0.010 | 7.893E-28 | 0.99 (0.94-1.05) | 0.855 |
| rs10745352 | 1 | 109871787 | 0.29 | T | -0.0440 | 0.006 | 1.452E-13 | 1.00 (0.96-1.03) | 0.826 |
| rs10745353 | 1 | 109877506 | 0.30 | A | -0.0442 | 0.006 | 9.574E-14 | 1.00 (0.97-1.04) | 0.869 |

|            |   |           |      |   |         |       |           |                  |       |
|------------|---|-----------|------|---|---------|-------|-----------|------------------|-------|
| rs4970843  | 1 | 109887191 | 0.53 | T | -0.0494 | 0.005 | 9.769E-23 | 1.00 (0.97-1.03) | 0.990 |
| rs17575427 | 1 | 110049127 | 0.10 | C | -0.0636 | 0.011 | 3.336E-09 | 1.00 (0.94-1.06) | 0.910 |
| rs17008806 | 1 | 220976257 | 0.72 | A | -0.0300 | 0.006 | 3.751E-08 | 1.00 (0.97-1.03) | 0.988 |
| rs12132819 | 1 | 220985350 | 0.76 | T | -0.0380 | 0.007 | 1.114E-09 | 1.00 (0.96-1.04) | 0.861 |
| rs6695664  | 1 | 234846396 | 0.85 | A | -0.0374 | 0.007 | 5.844E-08 | 0.96 (0.93-1.01) | 0.086 |
| rs514230   | 1 | 234858597 | 0.46 | A | -0.0353 | 0.005 | 9.376E-12 | 0.98 (0.95-1.01) | 0.138 |
| rs13027175 | 2 | 20932743  | 0.03 | T | -0.1005 | 0.018 | 2.093E-08 | 0.98 (0.89-1.07) | 0.635 |
| rs11679386 | 2 | 20985414  | 0.85 | T | -0.0569 | 0.009 | 7.028E-11 | 1.05 (0.99-1.10) | 0.107 |
| rs13008369 | 2 | 21100438  | 0.12 | T | -0.0458 | 0.008 | 2.296E-08 | 1.02 (0.97-1.07) | 0.454 |
| rs6722139  | 2 | 21101382  | 0.13 | A | -0.0513 | 0.008 | 1.358E-11 | 1.02 (0.97-1.06) | 0.469 |
| rs12994068 | 2 | 21118983  | 0.75 | A | -0.0381 | 0.006 | 6.555E-10 | 0.98 (0.95-1.02) | 0.315 |
| rs3903032  | 2 | 21119850  | 0.90 | A | -0.0692 | 0.009 | 2.662E-13 | 1.04 (0.99-1.09) | 0.119 |
| rs4971538  | 2 | 21121130  | 0.87 | T | -0.0689 | 0.008 | 2.534E-15 | 0.96 (0.91-1.01) | 0.079 |
| rs4468779  | 2 | 21125742  | 0.73 | T | -0.0372 | 0.006 | 7E-10     | 0.98 (0.94-1.01) | 0.203 |
| rs10188514 | 2 | 21134064  | 0.65 | T | -0.0519 | 0.006 | 3.049E-18 | 1.01 (0.98-1.04) | 0.649 |
| rs6734506  | 2 | 21134656  | 0.64 | T | -0.0562 | 0.005 | 1.272E-25 | 1.01 (0.98-1.04) | 0.646 |
| rs3923672  | 2 | 21136225  | 0.78 | C | -0.0499 | 0.006 | 1.807E-14 | 1.01 (0.98-1.05) | 0.514 |
| rs4502373  | 2 | 21139470  | 0.20 | A | -0.0583 | 0.007 | 2.116E-18 | 1.03 (0.99-1.07) | 0.167 |
| rs11096689 | 2 | 21140540  | 0.70 | T | -0.0794 | 0.006 | 0         | 1.01 (0.98-1.05) | 0.553 |
| rs6732011  | 2 | 21146521  | 0.37 | T | -0.0411 | 0.005 | 1.876E-14 | 0.97 (0.94-1.00) | 0.088 |
| rs6547409  | 2 | 21190209  | 0.04 | T | -0.1525 | 0.015 | 2.875E-25 | 0.95 (0.87-1.03) | 0.219 |
| rs11902417 | 2 | 21198900  | 0.26 | A | -0.0705 | 0.006 | 4.079E-31 | 0.96 (0.93-1.00) | 0.028 |
| rs4564803  | 2 | 21205502  | 0.24 | T | -0.0704 | 0.006 | 5.491E-31 | 0.96 (0.93-0.99) | 0.024 |
| rs10164442 | 2 | 21205563  | 0.69 | A | -0.0436 | 0.005 | 3.159E-14 | 0.99 (0.95-1.02) | 0.364 |
| rs13014683 | 2 | 21213126  | 0.18 | T | -0.0644 | 0.007 | 3.571E-23 | 1.03 (0.99-1.07) | 0.112 |
| rs6725189  | 2 | 21219001  | 0.19 | T | -0.0713 | 0.006 | 4.83E-30  | 1.03 (0.99-1.07) | 0.147 |
| rs4371387  | 2 | 21221133  | 0.21 | A | -0.0715 | 0.006 | 5.13E-30  | 1.04 (1.00-1.08) | 0.054 |
| rs952275   | 2 | 21221399  | 0.49 | T | -0.1066 | 0.005 | 0         | 1.00 (0.97-1.03) | 0.825 |

|            |   |          |      |   |         |       |           |                  |       |
|------------|---|----------|------|---|---------|-------|-----------|------------------|-------|
| rs2678379  | 2 | 21226560 | 0.25 | A | -0.0638 | 0.006 | 2.991E-24 | 0.95 (0.92-0.99) | 0.008 |
| rs6413458  | 2 | 21231592 | 0.08 | A | -0.1123 | 0.020 | 3.766E-08 | 1.06 (0.94-1.19) | 0.353 |
| rs11126598 | 2 | 21240364 | 0.31 | A | -0.0524 | 0.006 | 1.712E-17 | 0.97 (0.94-1.00) | 0.056 |
| rs12720828 | 2 | 21241744 | 0.17 | T | -0.0735 | 0.007 | 6.874E-27 | 1.03 (0.99-1.07) | 0.197 |
| rs679899   | 2 | 21250914 | 0.47 | A | -0.0816 | 0.009 | 3.132E-19 | 0.98 (0.95-1.01) | 0.248 |
| rs12720842 | 2 | 21257927 | 0.95 | T | -0.1108 | 0.017 | 1.686E-11 | 0.99 (0.87-1.12) | 0.834 |
| rs1469513  | 2 | 21259562 | 0.56 | T | -0.1122 | 0.005 | 0         | 1.00 (0.96-1.03) | 0.759 |
| rs579826   | 2 | 21261507 | 0.07 | T | -0.0919 | 0.009 | 4.079E-23 | 1.05 (1.00-1.11) | 0.066 |
| rs531819   | 2 | 21263639 | 0.13 | T | -0.1407 | 0.007 | 0         | 1.03 (0.99-1.07) | 0.203 |
| rs17398765 | 2 | 21270751 | 0.93 | A | -0.1134 | 0.011 | 9.376E-24 | 1.00 (0.91-1.09) | 0.931 |
| rs7567653  | 2 | 21276962 | 0.02 | A | -0.1899 | 0.022 | 5.181E-18 | 1.00 (0.91-1.09) | 0.988 |
| rs6548010  | 2 | 21277922 | 0.66 | A | -0.1176 | 0.006 | 0         | 0.99 (0.96-1.03) | 0.643 |
| rs515135   | 2 | 21286057 | 0.16 | T | -0.1458 | 0.007 | 0         | 1.01 (0.97-1.05) | 0.603 |
| rs562338   | 2 | 21288321 | 0.18 | A | -0.1437 | 0.007 | 0         | 1.00 (0.96-1.05) | 0.821 |
| rs11693775 | 2 | 21296546 | 0.68 | A | -0.1071 | 0.005 | 0         | 0.99 (0.96-1.03) | 0.703 |
| rs478588   | 2 | 21297149 | 0.20 | A | -0.1249 | 0.007 | 0         | 1.02 (0.98-1.06) | 0.412 |
| rs4665176  | 2 | 21305853 | 0.67 | T | -0.1047 | 0.005 | 0         | 1.00 (0.96-1.03) | 0.786 |
| rs754524   | 2 | 21311541 | 0.71 | T | -0.1059 | 0.006 | 0         | 0.99 (0.96-1.03) | 0.755 |
| rs17395512 | 2 | 21346556 | 0.65 | T | -0.1107 | 0.010 | 1.06E-30  | 0.99 (0.96-1.02) | 0.553 |
| rs1367119  | 2 | 21386375 | 0.21 | A | -0.1203 | 0.006 | 0         | 1.02 (0.98-1.06) | 0.391 |
| rs522250   | 2 | 21387113 | 0.19 | T | -0.1197 | 0.006 | 0         | 1.01 (0.97-1.05) | 0.586 |
| rs520861   | 2 | 21387239 | 0.25 | A | -0.0928 | 0.006 | 0         | 1.03 (0.99-1.06) | 0.142 |
| rs479545   | 2 | 21389897 | 0.17 | T | -0.1216 | 0.007 | 0         | 1.02 (0.98-1.06) | 0.389 |
| rs478148   | 2 | 21402981 | 0.24 | T | -0.0904 | 0.006 | 0         | 1.02 (0.99-1.06) | 0.186 |
| rs503662   | 2 | 21414142 | 0.23 | T | -0.0910 | 0.006 | 0         | 1.02 (0.98-1.06) | 0.279 |
| rs17042000 | 2 | 21422928 | 0.18 | T | -0.1156 | 0.007 | 0         | 1.01 (0.98-1.05) | 0.468 |
| rs365946   | 2 | 21439329 | 0.16 | T | -0.1064 | 0.007 | 0         | 1.01 (0.97-1.05) | 0.745 |
| rs13420469 | 2 | 21449034 | 0.74 | T | -0.0790 | 0.006 | 1.697E-37 | 0.98 (0.95-1.02) | 0.323 |

|            |   |           |      |   |         |       |           |                  |       |
|------------|---|-----------|------|---|---------|-------|-----------|------------------|-------|
| rs1079457  | 2 | 21449498  | 0.83 | C | -0.0846 | 0.007 | 1.09E-33  | 1.01 (0.97-1.05) | 0.594 |
| rs11900894 | 2 | 21450264  | 0.77 | A | -0.0793 | 0.006 | 8.053E-38 | 0.98 (0.95-1.02) | 0.331 |
| rs10198972 | 2 | 21453211  | 0.06 | A | -0.1048 | 0.014 | 4.417E-15 | 1.00 (0.93-1.07) | 0.959 |
| rs7566040  | 2 | 21454424  | 0.61 | T | -0.0497 | 0.005 | 3.509E-20 | 1.00 (0.97-1.04) | 0.788 |
| rs312042   | 2 | 21464498  | 0.71 | A | -0.0521 | 0.006 | 4.577E-19 | 0.99 (0.95-1.02) | 0.380 |
| rs13387827 | 2 | 21469152  | 0.12 | T | -0.1049 | 0.007 | 0         | 0.98 (0.94-1.03) | 0.485 |
| rs312049   | 2 | 21475944  | 0.60 | T | -0.0500 | 0.005 | 1.696E-20 | 1.00 (0.97-1.04) | 0.857 |
| rs13396400 | 2 | 21502727  | 0.55 | A | -0.0419 | 0.005 | 2.461E-14 | 1.01 (0.98-1.04) | 0.637 |
| rs6704721  | 2 | 21507500  | 0.70 | A | -0.0430 | 0.006 | 8.832E-14 | 1.00 (0.97-1.04) | 0.924 |
| rs219535   | 2 | 21531099  | 0.67 | T | -0.0414 | 0.005 | 2.304E-14 | 1.01 (0.98-1.04) | 0.635 |
| rs219540   | 2 | 21532767  | 0.68 | A | -0.0419 | 0.005 | 1.639E-14 | 1.01 (0.98-1.04) | 0.639 |
| rs2337901  | 2 | 21537251  | 0.62 | T | -0.0395 | 0.005 | 1.582E-13 | 1.02 (0.99-1.05) | 0.282 |
| rs1025447  | 2 | 44022970  | 0.80 | T | -0.0396 | 0.007 | 2.76E-09  | 0.97 (0.93-1.01) | 0.153 |
| rs10439467 | 2 | 44048346  | 0.06 | T | -0.0648 | 0.012 | 8.138E-08 | 0.98 (0.92-1.05) | 0.518 |
| rs6756629  | 2 | 44065090  | 0.10 | A | -0.1394 | 0.018 | 7.985E-17 | 1.03 (0.97-1.09) | 0.388 |
| rs4953023  | 2 | 44074000  | 0.09 | A | -0.1347 | 0.012 | 3.345E-33 | 1.03 (0.96-1.09) | 0.439 |
| rs6755809  | 2 | 44096336  | 0.75 | A | -0.0806 | 0.006 | 0         | 1.00 (0.97-1.04) | 0.900 |
| rs1052639  | 2 | 118583100 | 0.11 | A | -0.0484 | 0.009 | 6.569E-08 | 0.98 (0.93-1.03) | 0.480 |
| rs17508904 | 2 | 118594720 | 0.08 | T | -0.0481 | 0.009 | 9.334E-08 | 0.98 (0.93-1.03) | 0.419 |
| rs4072296  | 5 | 74242002  | 0.45 | T | -0.0337 | 0.005 | 1.819E-10 | 0.98 (0.95-1.01) | 0.205 |
| rs4703642  | 5 | 74262162  | 0.47 | A | -0.0311 | 0.005 | 3.149E-10 | 0.98 (0.95-1.01) | 0.178 |
| rs7700719  | 5 | 74291869  | 0.52 | A | -0.0281 | 0.005 | 3.296E-08 | 0.97 (0.94-1.00) | 0.062 |
| rs7714420  | 5 | 74340327  | 0.72 | A | -0.0325 | 0.006 | 8.847E-09 | 0.98 (0.94-1.01) | 0.155 |
| rs4703645  | 5 | 74361140  | 0.79 | T | -0.0573 | 0.007 | 1.783E-16 | 0.96 (0.92-1.00) | 0.060 |
| rs3923323  | 5 | 74372141  | 0.81 | T | -0.0567 | 0.007 | 2.224E-16 | 0.96 (0.92-1.00) | 0.071 |
| rs10462511 | 5 | 74384115  | 0.62 | A | -0.0450 | 0.005 | 1.939E-16 | 0.96 (0.93-0.99) | 0.019 |
| rs17671496 | 5 | 74499631  | 0.88 | A | -0.0513 | 0.008 | 6.392E-10 | 0.95 (0.90-1.00) | 0.033 |
| rs918623   | 5 | 74596682  | 0.74 | T | -0.0676 | 0.006 | 4.569E-28 | 0.97 (0.94-1.01) | 0.137 |

|            |   |          |      |   |         |       |           |                  |       |
|------------|---|----------|------|---|---------|-------|-----------|------------------|-------|
| rs10474433 | 5 | 74616843 | 0.66 | T | -0.0707 | 0.005 | 1.882E-37 | 0.97 (0.94-1.00) | 0.054 |
| rs3843480  | 5 | 74624482 | 0.61 | T | -0.0758 | 0.005 | 0         | 0.99 (0.96-1.02) | 0.410 |
| rs12654264 | 5 | 74648603 | 0.63 | A | -0.0744 | 0.005 | 0         | 1.02 (0.99-1.05) | 0.211 |
| rs3846662  | 5 | 74651084 | 0.59 | A | -0.0686 | 0.005 | 2.44E-35  | 0.99 (0.96-1.02) | 0.579 |
| rs12916    | 5 | 74656539 | 0.62 | T | -0.0755 | 0.005 | 0         | 1.00 (0.96-1.03) | 0.773 |
| rs4703670  | 5 | 74660356 | 0.76 | T | -0.0592 | 0.006 | 1.213E-20 | 0.95 (0.92-0.99) | 0.011 |
| rs6453133  | 5 | 74692776 | 0.73 | A | -0.0492 | 0.006 | 2.429E-18 | 0.97 (0.94-1.00) | 0.087 |
| rs17648288 | 5 | 74696638 | 0.91 | C | -0.0600 | 0.009 | 2.067E-12 | 0.97 (0.93-1.03) | 0.316 |
| rs12173076 | 5 | 74697050 | 0.85 | T | -0.0608 | 0.008 | 2.698E-13 | 0.94 (0.89-0.98) | 0.006 |
| rs6872314  | 5 | 74736065 | 0.77 | A | -0.0479 | 0.006 | 3.454E-15 | 0.95 (0.92-0.99) | 0.006 |
| rs5744636  | 5 | 74867581 | 0.84 | T | -0.0602 | 0.008 | 3.541E-14 | 0.93 (0.89-0.98) | 0.004 |
| rs5744667  | 5 | 74876613 | 0.83 | T | -0.0528 | 0.008 | 9.841E-11 | 0.93 (0.89-0.98) | 0.004 |
| rs5744707  | 5 | 74890618 | 0.90 | A | -0.0596 | 0.009 | 3.893E-12 | 1.03 (0.98-1.08) | 0.272 |
| rs2287711  | 5 | 74898752 | 0.78 | T | -0.0604 | 0.006 | 6.069E-21 | 0.95 (0.91-0.98) | 0.005 |
| rs10078671 | 5 | 74902848 | 0.87 | C | -0.0593 | 0.008 | 5.252E-14 | 1.07 (1.02-1.12) | 0.004 |
| rs904743   | 5 | 74917862 | 0.86 | A | -0.0628 | 0.007 | 4.164E-16 | 0.93 (0.89-0.97) | 0.002 |
| rs1427924  | 5 | 74924890 | 0.80 | A | -0.0605 | 0.006 | 5.216E-21 | 0.95 (0.91-0.99) | 0.006 |
| rs253393   | 5 | 74929647 | 0.75 | A | -0.0443 | 0.006 | 1.242E-13 | 0.96 (0.93-1.00) | 0.043 |
| rs253412   | 5 | 74955841 | 0.68 | A | -0.0559 | 0.005 | 1.407E-24 | 0.99 (0.95-1.02) | 0.402 |
| rs253414   | 5 | 74956517 | 0.67 | T | -0.0546 | 0.005 | 2.352E-23 | 0.98 (0.95-1.02) | 0.369 |
| rs17563395 | 5 | 74962242 | 0.93 | A | -0.0575 | 0.010 | 3.113E-08 | 0.99 (0.93-1.05) | 0.723 |
| rs16872768 | 5 | 74982207 | 0.64 | T | -0.0513 | 0.005 | 3.951E-21 | 0.99 (0.96-1.02) | 0.451 |
| rs17563686 | 5 | 74984818 | 0.71 | A | -0.0458 | 0.006 | 6.278E-15 | 1.01 (0.98-1.05) | 0.530 |
| rs888789   | 5 | 74988369 | 0.56 | A | -0.0411 | 0.005 | 4.345E-14 | 0.99 (0.96-1.02) | 0.511 |
| rs1817869  | 5 | 74989037 | 0.70 | T | -0.0455 | 0.006 | 2.234E-14 | 0.99 (0.95-1.02) | 0.463 |
| rs3797580  | 5 | 75003056 | 0.65 | A | -0.0505 | 0.006 | 1.227E-18 | 0.99 (0.96-1.02) | 0.370 |
| rs2307111  | 5 | 75003678 | 0.61 | T | -0.0451 | 0.005 | 2.631E-17 | 0.98 (0.95-1.01) | 0.247 |
| rs2047059  | 5 | 75008193 | 0.69 | T | -0.0458 | 0.006 | 6.802E-15 | 0.98 (0.94-1.01) | 0.199 |



|            |   |           |      |   |         |       |           |                  |       |
|------------|---|-----------|------|---|---------|-------|-----------|------------------|-------|
| rs6873053  | 5 | 156376703 | 0.11 | A | -0.0534 | 0.010 | 2.406E-08 | 0.96 (0.91-1.02) | 0.180 |
| rs4704727  | 5 | 156380067 | 0.33 | T | -0.0500 | 0.005 | 4.007E-19 | 0.99 (0.96-1.02) | 0.530 |
| rs6882076  | 5 | 156390297 | 0.34 | T | -0.0536 | 0.005 | 1.888E-22 | 0.99 (0.96-1.03) | 0.619 |
| rs6896499  | 5 | 156431325 | 0.15 | T | -0.0423 | 0.007 | 3.712E-09 | 0.96 (0.92-1.00) | 0.072 |
| rs7721033  | 5 | 156432523 | 0.20 | T | -0.0370 | 0.007 | 1.047E-08 | 1.02 (0.98-1.06) | 0.357 |
| rs10036890 | 5 | 156433651 | 0.22 | A | -0.0369 | 0.007 | 2.34E-08  | 1.02 (0.98-1.06) | 0.350 |
| rs2277025  | 5 | 156460095 | 0.60 | T | -0.0318 | 0.005 | 8.216E-10 | 0.99 (0.96-1.02) | 0.508 |
| rs2270926  | 5 | 156469783 | 0.21 | A | -0.0368 | 0.007 | 3.299E-08 | 1.01 (0.97-1.05) | 0.640 |
| rs10038271 | 5 | 156470401 | 0.16 | T | -0.0398 | 0.007 | 1.996E-08 | 1.01 (0.97-1.05) | 0.783 |
| rs6555822  | 5 | 156473185 | 0.18 | A | -0.0433 | 0.007 | 1.794E-09 | 0.96 (0.92-1.00) | 0.034 |
| rs3757354  | 6 | 16127407  | 0.24 | T | -0.0441 | 0.007 | 1.162E-11 | 1.01 (0.97-1.05) | 0.521 |
| rs6939056  | 6 | 16160569  | 0.25 | T | -0.0327 | 0.006 | 7.24E-08  | 1.01 (0.97-1.04) | 0.657 |
| rs1800562  | 6 | 26093141  | 0.09 | A | -0.0714 | 0.012 | 6.069E-10 | 0.98 (0.92-1.05) | 0.602 |
| rs868943   | 6 | 116337503 | 0.41 | A | -0.0315 | 0.005 | 3.346E-09 | 1.02 (0.99-1.05) | 0.206 |
| rs12196579 | 6 | 116351724 | 0.40 | T | -0.0314 | 0.005 | 3.338E-09 | 1.02 (0.99-1.05) | 0.231 |
| rs11153594 | 6 | 116354591 |      | T | -0.0312 | 0.005 | 2.946E-09 | 1.02 (0.99-1.05) | 0.240 |
| rs662138   | 6 | 160564476 | 0.82 | C | -0.0532 | 0.007 | 5.785E-13 | 0.99 (0.95-1.03) | 0.578 |
| rs650284   | 6 | 160574535 | 0.62 | A | -0.0301 | 0.005 | 6.176E-08 | 0.98 (0.95-1.01) | 0.204 |
| rs1564348  | 6 | 160578860 | 0.81 | T | -0.0599 | 0.007 | 1.702E-17 | 0.99 (0.95-1.04) | 0.737 |
| rs11751605 | 6 | 160963230 | 0.84 | T | -0.0442 | 0.007 | 8.366E-09 | 1.05 (1.01-1.10) | 0.019 |
| rs3798221  | 6 | 160998148 | 0.20 | T | -0.0457 | 0.006 | 1.126E-12 | 1.02 (0.99-1.07) | 0.219 |
| rs7765803  | 6 | 161007538 | 0.37 | C | -0.0313 | 0.005 | 6.475E-09 | 1.02 (0.99-1.06) | 0.133 |
| rs10455872 | 6 | 161010118 | 0.94 | A | -0.1155 | 0.014 | 1.356E-15 | 1.05 (0.98-1.13) | 0.166 |
| rs9457946  | 6 | 161012749 | 0.36 | T | -0.0308 | 0.005 | 1.242E-08 | 1.03 (0.99-1.06) | 0.121 |
| rs9456552  | 6 | 161017120 | 0.38 | T | -0.0285 | 0.005 | 9.507E-08 | 1.02 (0.99-1.05) | 0.170 |
| rs1321195  | 6 | 161084156 | 0.19 | A | -0.0461 | 0.007 | 2.155E-10 | 1.04 (1.00-1.09) | 0.050 |
| rs4374884  | 7 | 21600902  | 0.78 | A | -0.0373 | 0.006 | 2.596E-09 | 1.00 (0.96-1.03) | 0.875 |
| rs11772101 | 7 | 21601444  | 0.59 | T | -0.0309 | 0.005 | 1.884E-08 | 1.01 (0.98-1.04) | 0.429 |

|            |   |           |      |   |         |       |           |                  |       |
|------------|---|-----------|------|---|---------|-------|-----------|------------------|-------|
| rs12670798 | 7 | 21607352  | 0.76 | T | -0.0379 | 0.006 | 6.878E-10 | 0.99 (0.96-1.03) | 0.653 |
| rs12673820 | 7 | 21612705  | 0.57 | T | -0.0291 | 0.005 | 9.434E-08 | 1.00 (0.97-1.03) | 0.890 |
| rs217406   | 7 | 44573761  | 0.79 | C | -0.0554 | 0.009 | 4.925E-11 | 0.98 (0.94-1.03) | 0.497 |
| rs2073547  | 7 | 44582331  | 0.74 | A | -0.0484 | 0.008 | 2.597E-10 | 1.03 (0.98-1.07) | 0.243 |
| rs217386   | 7 | 44600695  | 0.45 | A | -0.0366 | 0.005 | 4.245E-11 | 1.00 (0.97-1.04) | 0.771 |
| rs217385   | 7 | 44602187  | 0.43 | T | -0.0353 | 0.005 | 7.079E-11 | 1.01 (0.97-1.04) | 0.746 |
| rs710887   | 7 | 44709372  | 0.33 | T | -0.0334 | 0.006 | 3.287E-08 | 0.99 (0.96-1.03) | 0.683 |
| rs983309   | 8 | 9177732   | 0.10 | T | -0.0596 | 0.008 | 1.807E-13 | 1.02 (0.97-1.08) | 0.354 |
| rs10099512 | 8 | 9178821   | 0.08 | C | -0.0579 | 0.011 | 9.499E-08 | 1.02 (0.95-1.09) | 0.632 |
| rs4841132  | 8 | 9183596   | 0.11 | A | -0.0669 | 0.009 | 1.483E-12 | 1.01 (0.96-1.07) | 0.615 |
| rs2126260  | 8 | 9185081   | 0.20 | T | -0.0336 | 0.006 | 6.394E-08 | 0.98 (0.94-1.01) | 0.207 |
| rs2126259  | 8 | 9185146   | 0.09 | T | -0.0674 | 0.008 | 7.434E-15 | 1.01 (0.95-1.06) | 0.845 |
| rs1461729  | 8 | 9187242   | 0.12 | A | -0.0633 | 0.009 | 1.263E-12 | 1.01 (0.95-1.06) | 0.796 |
| rs7004769  | 8 | 9187595   | 0.23 | A | -0.0344 | 0.006 | 3.833E-08 | 0.97 (0.94-1.01) | 0.170 |
| rs13265179 | 8 | 9194694   | 0.14 | A | -0.0561 | 0.008 | 5.096E-11 | 0.98 (0.94-1.03) | 0.537 |
| rs6982486  | 8 | 59332694  | 0.67 | A | -0.0317 | 0.005 | 8.919E-09 | 1.00 (0.97-1.03) | 0.863 |
| rs13277801 | 8 | 59353534  | 0.66 | T | -0.0318 | 0.005 | 6.707E-09 | 1.00 (0.97-1.03) | 0.841 |
| rs13273254 | 8 | 126457553 | 0.81 | A | -0.0420 | 0.007 | 1.591E-10 | 0.96 (0.93-1.00) | 0.052 |
| rs4518686  | 8 | 126470817 | 0.62 | A | -0.0460 | 0.005 | 1.545E-17 | 0.96 (0.93-0.99) | 0.004 |
| rs12679189 | 8 | 126473565 | 0.80 | T | -0.0447 | 0.007 | 2.325E-11 | 0.96 (0.92-0.99) | 0.024 |
| rs2954018  | 8 | 126477153 | 0.68 | T | -0.0375 | 0.006 | 2.046E-11 | 1.01 (0.97-1.04) | 0.753 |
| rs6982502  | 8 | 126479362 | 0.53 | T | -0.0547 | 0.005 | 2.957E-26 | 0.98 (0.95-1.01) | 0.179 |
| rs4871603  | 8 | 126480367 | 0.63 | T | -0.0333 | 0.005 | 3.096E-10 | 1.01 (0.98-1.04) | 0.567 |
| rs2954022  | 8 | 126482621 | 0.48 | A | -0.0579 | 0.005 | 2.591E-29 | 0.98 (0.95-1.01) | 0.250 |
| rs2980862  | 8 | 126484638 | 0.69 | C | -0.0378 | 0.006 | 1.047E-11 | 1.00 (0.97-1.03) | 0.877 |
| rs4592055  | 8 | 126486145 | 0.82 | T | -0.0446 | 0.007 | 7.316E-11 | 0.96 (0.92-0.99) | 0.027 |
| rs4567057  | 8 | 126486906 | 0.84 | A | -0.0430 | 0.007 | 3.957E-10 | 0.96 (0.92-1.00) | 0.030 |
| rs2954031  | 8 | 126491733 | 0.46 | T | -0.0563 | 0.005 | 2.697E-27 | 0.98 (0.95-1.01) | 0.152 |

|            |    |           |      |   |         |       |           |                  |       |
|------------|----|-----------|------|---|---------|-------|-----------|------------------|-------|
| rs12164213 | 8  | 126492448 | 0.78 | T | -0.0362 | 0.006 | 5.506E-09 | 0.97 (0.93-1.00) | 0.085 |
| rs8180991  | 8  | 126500350 | 0.79 | C | -0.0409 | 0.007 | 7.976E-10 | 1.02 (0.98-1.06) | 0.403 |
| rs6987702  | 8  | 126504726 | 0.72 | T | -0.0362 | 0.006 | 4.084E-09 | 1.00 (0.96-1.03) | 0.831 |
| rs2954038  | 8  | 126507389 | 0.71 | A | -0.0431 | 0.006 | 3.441E-12 | 1.00 (0.97-1.03) | 0.973 |
| rs6558405  | 8  | 144991176 | 0.58 | T | -0.0337 | 0.006 | 3.867E-09 | 0.98 (0.95-1.01) | 0.135 |
| rs7002152  | 8  | 145000056 | 0.59 | T | -0.0357 | 0.005 | 2.04E-10  | 0.98 (0.95-1.02) | 0.301 |
| rs7006770  | 8  | 145000602 | 0.60 | T | -0.0352 | 0.005 | 5.483E-10 | 0.98 (0.95-1.02) | 0.328 |
| rs11136341 | 8  | 145043543 | 0.65 | A | -0.0453 | 0.006 | 4.442E-13 | 0.98 (0.95-1.02) | 0.293 |
| rs3935755  | 8  | 145047187 | 0.61 | A | -0.0380 | 0.005 | 1.195E-11 | 0.98 (0.95-1.02) | 0.283 |
| rs11136343 | 8  | 145058986 | 0.64 | A | -0.0385 | 0.006 | 1.185E-10 | 0.97 (0.94-1.01) | 0.137 |
| rs644234   | 9  | 136142217 | 0.66 | T | -0.0385 | 0.005 | 3.254E-13 | 1.00 (0.96-1.03) | 0.842 |
| rs612169   | 9  | 136143442 | 0.69 | A | -0.0443 | 0.005 | 1.365E-16 | 1.00 (0.97-1.03) | 0.890 |
| rs505922   | 9  | 136149229 | 0.68 | T | -0.0431 | 0.005 | 5.593E-16 | 1.00 (0.96-1.03) | 0.855 |
| rs630014   | 9  | 136149722 | 0.50 | A | -0.0315 | 0.005 | 8.426E-10 | 1.01 (0.98-1.04) | 0.726 |
| rs579459   | 9  | 136154168 | 0.79 | T | -0.0603 | 0.007 | 2.361E-21 | 1.00 (0.96-1.04) | 0.982 |
| rs2792744  | 10 | 113902418 | 0.76 | A | -0.0340 | 0.006 | 2.221E-08 | 1.00 (0.96-1.03) | 0.800 |
| rs2487294  | 10 | 113937941 | 0.72 | T | -0.0338 | 0.006 | 2.44E-09  | 0.99 (0.96-1.02) | 0.467 |
| rs2803621  | 10 | 113939584 | 0.73 | A | -0.0338 | 0.006 | 2.729E-09 | 0.99 (0.96-1.02) | 0.442 |
| rs108499   | 11 | 61547237  | 0.35 | T | -0.0474 | 0.005 | 4.319E-18 | 0.98 (0.94-1.01) | 0.153 |
| rs174538   | 11 | 61560081  | 0.34 | A | -0.0506 | 0.006 | 9.617E-20 | 0.99 (0.96-1.02) | 0.503 |
| rs174549   | 11 | 61571382  | 0.33 | A | -0.0494 | 0.006 | 5.27E-20  | 0.99 (0.96-1.02) | 0.543 |
| rs174556   | 11 | 61580635  | 0.32 | T | -0.0493 | 0.006 | 6.748E-20 | 0.99 (0.96-1.03) | 0.607 |
| rs174570   | 11 | 61597212  | 0.15 | T | -0.0554 | 0.007 | 2.945E-13 | 1.02 (0.97-1.06) | 0.510 |
| rs2727270  | 11 | 61603237  | 0.14 | T | -0.0442 | 0.008 | 9.358E-09 | 0.99 (0.94-1.04) | 0.667 |
| rs174577   | 11 | 61604814  | 0.37 | A | -0.0509 | 0.005 | 1.749E-21 | 0.99 (0.96-1.02) | 0.557 |
| rs174579   | 11 | 61605613  | 0.22 | T | -0.0395 | 0.007 | 4.456E-10 | 0.99 (0.95-1.03) | 0.533 |
| rs174583   | 11 | 61609750  | 0.36 | T | -0.0511 | 0.005 | 1.171E-21 | 0.99 (0.96-1.03) | 0.656 |
| rs174585   | 11 | 61611694  | 0.24 | A | -0.0417 | 0.007 | 2.437E-10 | 0.99 (0.95-1.03) | 0.657 |

|            |    |           |      |   |         |       |           |                  |       |
|------------|----|-----------|------|---|---------|-------|-----------|------------------|-------|
| rs174591   | 11 | 61617676  | 0.29 | A | -0.0383 | 0.006 | 2.168E-10 | 0.98 (0.95-1.02) | 0.371 |
| rs174597   | 11 | 61621040  | 0.20 | C | -0.0408 | 0.007 | 1.555E-08 | 0.99 (0.96-1.03) | 0.788 |
| rs174601   | 11 | 61623140  | 0.38 | T | -0.0523 | 0.006 | 2.115E-20 | 1.00 (0.96-1.03) | 0.786 |
| rs2526678  | 11 | 61623793  | 0.12 | A | -0.0626 | 0.009 | 6.207E-11 | 1.00 (0.94-1.07) | 0.882 |
| rs174605   | 11 | 61626921  | 0.31 | T | -0.0369 | 0.006 | 3.803E-10 | 0.99 (0.96-1.03) | 0.732 |
| rs174616   | 11 | 61629122  | 0.46 | A | -0.0363 | 0.005 | 7.919E-12 | 0.99 (0.95-1.02) | 0.381 |
| rs12279373 | 11 | 116600400 | 0.93 | A | -0.0586 | 0.010 | 5.245E-10 | 0.99 (0.93-1.05) | 0.767 |
| rs1558861  | 11 | 116607437 |      | T | -0.1073 | 0.016 | 2.32E-10  | 0.95 (0.90-1.01) | 0.130 |
| rs12292921 | 11 | 116621963 | 0.90 | T | -0.0632 | 0.010 | 3.233E-11 | 1.01 (0.95-1.07) | 0.765 |
| rs2160669  | 11 | 116647607 | 0.90 | T | -0.0853 | 0.010 | 1.527E-16 | 0.95 (0.90-1.01) | 0.092 |
| rs964184   | 11 | 116648917 | 0.87 | C | -0.0807 | 0.008 | 1.473E-26 | 1.02 (0.98-1.07) | 0.362 |
| rs4417316  | 11 | 116652301 | 0.11 | T | -0.0535 | 0.009 | 8.999E-10 | 1.04 (0.99-1.10) | 0.133 |
| rs12285095 | 11 | 116658031 | 0.91 | T | -0.0666 | 0.011 | 1.113E-11 | 1.01 (0.95-1.08) | 0.698 |
| rs2266788  | 11 | 116660686 | 0.93 | A | -0.0802 | 0.010 | 2.999E-14 | 0.96 (0.91-1.02) | 0.196 |
| rs662799   | 11 | 116663707 | 0.94 | A | -0.0893 | 0.012 | 2.399E-13 | 0.95 (0.89-1.01) | 0.092 |
| rs9804646  | 11 | 116665079 | 0.07 | T | -0.0618 | 0.012 | 1.343E-08 | 1.06 (1.00-1.13) | 0.062 |
| rs11216137 | 11 | 116669828 | 0.10 | A | -0.0605 | 0.012 | 3.448E-08 | 1.05 (0.99-1.12) | 0.098 |
| rs10047462 | 11 | 116722041 | 0.89 | T | -0.0630 | 0.010 | 1.184E-09 | 0.95 (0.90-1.00) | 0.041 |
| rs17135399 | 11 | 126218541 | 0.96 | A | -0.0898 | 0.014 | 4.204E-11 | 1.00 (0.94-1.07) | 0.983 |
| rs4937122  | 11 | 126228659 | 0.92 | T | -0.0792 | 0.012 | 5.462E-12 | 0.98 (0.92-1.05) | 0.551 |
| rs7940893  | 11 | 126246076 | 0.85 | T | -0.0568 | 0.007 | 1.7E-14   | 0.98 (0.93-1.02) | 0.301 |
| rs11220463 | 11 | 126248211 | 0.92 | A | -0.0696 | 0.009 | 1.325E-15 | 1.02 (0.97-1.06) | 0.426 |
| rs10774625 | 12 | 111910219 | 0.44 | A | -0.0309 | 0.005 | 1.781E-09 | 0.97 (0.94-1.00) | 0.055 |
| rs593226   | 12 | 111993886 | 0.72 | A | -0.0329 | 0.006 | 2.803E-08 | 0.98 (0.94-1.01) | 0.220 |
| rs11066028 | 12 | 112245170 | 0.71 | A | -0.0343 | 0.006 | 5.422E-09 | 1.02 (0.98-1.05) | 0.278 |
| rs17630235 | 12 | 112591686 | 0.40 | A | -0.0324 | 0.005 | 2.336E-09 | 0.99 (0.95-1.02) | 0.350 |
| rs2285810  | 12 | 112699540 | 0.67 | T | -0.0305 | 0.006 | 8.316E-08 | 1.02 (0.98-1.05) | 0.362 |
| rs11066320 | 12 | 112906415 | 0.41 | A | -0.0292 | 0.005 | 1.52E-08  | 0.99 (0.96-1.02) | 0.556 |

|            |    |           |      |   |         |       |           |                  |       |
|------------|----|-----------|------|---|---------|-------|-----------|------------------|-------|
| rs2251468  | 12 | 121405126 | 0.66 | A | -0.0413 | 0.005 | 9.454E-15 | 1.02 (0.99-1.05) | 0.297 |
| rs1169288  | 12 | 121416650 | 0.68 | A | -0.0439 | 0.006 | 1.125E-15 | 1.02 (0.98-1.05) | 0.321 |
| rs1169286  | 12 | 121419056 | 0.59 | T | -0.0350 | 0.005 | 2.943E-11 | 1.00 (0.97-1.03) | 0.994 |
| rs2393791  | 12 | 121423956 | 0.61 | T | -0.0342 | 0.005 | 8.457E-11 | 1.02 (0.99-1.06) | 0.201 |
| rs2393775  | 12 | 121424574 | 0.62 | A | -0.0349 | 0.005 | 3.662E-11 | 1.02 (0.99-1.06) | 0.149 |
| rs1169302  | 12 | 121432302 | 0.56 | T | -0.0300 | 0.005 | 2.214E-09 | 1.00 (0.97-1.03) | 0.898 |
| rs1169313  | 12 | 121442670 | 0.65 | T | -0.0377 | 0.005 | 2.476E-13 | 1.02 (0.99-1.06) | 0.152 |
| rs2257764  | 12 | 121446446 | 0.70 | A | -0.0405 | 0.006 | 4.442E-14 | 0.98 (0.95-1.02) | 0.328 |
| rs4942505  | 13 | 32963707  | 0.53 | T | -0.0275 | 0.005 | 9.812E-08 | 0.99 (0.96-1.02) | 0.611 |
| rs247616   | 16 | 56989590  | 0.32 | T | -0.0415 | 0.006 | 9.248E-13 | 1.00 (0.97-1.04) | 0.927 |
| rs1800775  | 16 | 56995236  | 0.53 | A | -0.0304 | 0.006 | 1.025E-08 | 1.01 (0.98-1.04) | 0.656 |
| rs11508026 | 16 | 56999328  | 0.44 | T | -0.0337 | 0.006 | 1.583E-10 | 1.01 (0.98-1.04) | 0.604 |
| rs7205804  | 16 | 57004889  | 0.45 | A | -0.0335 | 0.006 | 1.081E-10 | 1.01 (0.98-1.04) | 0.509 |
| rs11076175 | 16 | 57006378  | 0.82 | A | -0.0443 | 0.008 | 4.358E-08 | 1.01 (0.97-1.05) | 0.708 |
| rs16973520 | 16 | 71996291  | 0.76 | T | -0.0372 | 0.006 | 3.088E-09 | 1.00 (0.96-1.04) | 1.000 |
| rs8053891  | 16 | 71997789  | 0.77 | A | -0.0385 | 0.006 | 7.432E-10 | 1.01 (0.97-1.04) | 0.759 |
| rs9925462  | 16 | 72000195  | 0.78 | C | -0.0424 | 0.006 | 1.324E-11 | 1.00 (0.96-1.03) | 0.899 |
| rs10492825 | 16 | 72018417  | 0.73 | T | -0.0466 | 0.006 | 1.237E-14 | 1.00 (0.97-1.04) | 0.827 |
| rs11645540 | 16 | 72028930  | 0.74 | T | -0.0483 | 0.006 | 2.639E-15 | 1.00 (0.97-1.04) | 0.880 |
| rs4788597  | 16 | 72043039  | 0.36 | T | -0.0345 | 0.005 | 7.436E-09 | 1.04 (1.01-1.08) | 0.021 |
| rs4788598  | 16 | 72044238  | 0.37 | C | -0.0344 | 0.005 | 8.415E-09 | 1.05 (1.01-1.08) | 0.006 |
| rs6499557  | 16 | 72082654  | 0.48 | A | -0.0305 | 0.005 | 4.514E-08 | 1.03 (1.00-1.06) | 0.046 |
| rs217181   | 16 | 72114002  | 0.19 | T | -0.0464 | 0.007 | 6.352E-11 | 1.04 (1.00-1.08) | 0.058 |
| rs8060878  | 16 | 72243624  | 0.56 | A | -0.0338 | 0.005 | 1.209E-09 | 1.03 (1.00-1.07) | 0.033 |
| rs9931011  | 16 | 72245185  | 0.57 | A | -0.0332 | 0.005 | 2.163E-09 | 0.97 (0.94-1.00) | 0.025 |
| rs11655943 | 17 | 45385640  | 0.47 | T | -0.0277 | 0.005 | 7.795E-08 | 1.06 (1.02-1.09) | 0.001 |
| rs7225700  | 17 | 45391804  | 0.32 | T | -0.0322 | 0.005 | 3.921E-09 | 1.04 (1.01-1.08) | 0.007 |
| rs7218813  | 17 | 45394752  | 0.29 | T | -0.0306 | 0.006 | 4.075E-08 | 1.06 (1.02-1.09) | 0.002 |

|            |    |          |      |   |         |       |           |                  |       |
|------------|----|----------|------|---|---------|-------|-----------|------------------|-------|
| rs6504833  | 17 | 45396087 | 0.34 | A | -0.0316 | 0.005 | 5.651E-09 | 1.04 (1.01-1.08) | 0.007 |
| rs7216112  | 17 | 45406345 | 0.31 | T | -0.0310 | 0.005 | 3.109E-08 | 1.04 (1.01-1.08) | 0.011 |
| rs7214410  | 17 | 45422628 | 0.42 | A | -0.0281 | 0.005 | 7.42E-08  | 1.04 (1.01-1.07) | 0.010 |
| rs12452315 | 17 | 45479446 | 0.48 | A | -0.0280 | 0.005 | 4.366E-08 | 1.06 (1.02-1.09) | 0.001 |
| rs2043305  | 19 | 10728320 | 0.21 | A | -0.0452 | 0.007 | 1.856E-12 | 0.99 (0.95-1.03) | 0.686 |
| rs11085745 | 19 | 10824915 | 0.02 | A | -0.1365 | 0.020 | 2.218E-11 | 0.86 (0.73-1.01) | 0.069 |
| rs11880613 | 19 | 10903972 | 0.19 | A | -0.0720 | 0.007 | 4.388E-26 | 1.01 (0.97-1.05) | 0.703 |
| rs1610095  | 19 | 10904689 | 0.34 | C | -0.0571 | 0.006 | 7.695E-25 | 0.99 (0.96-1.03) | 0.668 |
| rs11881315 | 19 | 10909953 | 0.17 | T | -0.0734 | 0.007 | 1.118E-27 | 1.01 (0.97-1.05) | 0.701 |
| rs2287029  | 19 | 10916684 | 0.16 | T | -0.0786 | 0.007 | 3.718E-31 | 1.01 (0.97-1.05) | 0.683 |
| rs3786719  | 19 | 10927100 | 0.31 | C | -0.0453 | 0.005 | 1.142E-16 | 0.99 (0.96-1.03) | 0.680 |
| rs11881156 | 19 | 10950125 | 0.15 | T | -0.0794 | 0.007 | 3.115E-30 | 1.00 (0.96-1.04) | 0.840 |
| rs12611017 | 19 | 11065021 | 0.25 | A | -0.0584 | 0.006 | 3.086E-22 | 0.99 (0.95-1.02) | 0.432 |
| rs11879293 | 19 | 11072610 | 0.36 | A | -0.0443 | 0.005 | 8.603E-17 | 0.98 (0.95-1.01) | 0.242 |
| rs12983316 | 19 | 11114352 | 0.77 | A | -0.0696 | 0.008 | 1.787E-18 | 0.97 (0.91-1.02) | 0.244 |
| rs12610693 | 19 | 11139636 | 0.32 | T | -0.0537 | 0.006 | 2.182E-19 | 0.98 (0.95-1.02) | 0.286 |
| rs4804562  | 19 | 11147615 | 0.30 | A | -0.0577 | 0.006 | 1.029E-23 | 0.98 (0.95-1.02) | 0.315 |
| rs12052201 | 19 | 11159096 | 0.24 | T | -0.0752 | 0.006 | 1.399E-34 | 0.98 (0.95-1.02) | 0.381 |
| rs12052058 | 19 | 11159525 | 0.24 | T | -0.0737 | 0.006 | 3.143E-33 | 0.98 (0.94-1.02) | 0.338 |
| rs3786722  | 19 | 11161537 | 0.25 | A | -0.0750 | 0.006 | 1.266E-34 | 0.98 (0.95-1.02) | 0.363 |
| rs1122608  | 19 | 11163601 | 0.23 | T | -0.0738 | 0.006 | 1.237E-33 | 0.98 (0.95-1.02) | 0.383 |
| rs3786725  | 19 | 11166827 | 0.29 | A | -0.0581 | 0.006 | 1.088E-22 | 0.98 (0.94-1.01) | 0.182 |
| rs6511720  | 19 | 11202306 | 0.10 | T | -0.2108 | 0.009 | 0         | 0.99 (0.94-1.04) | 0.714 |
| rs8110695  | 19 | 11206530 | 0.17 | A | -0.1118 | 0.008 | 0         | 0.97 (0.93-1.01) | 0.197 |
| rs2228671  | 19 | 11210912 | 0.10 | T | -0.1733 | 0.009 | 0         | 0.98 (0.93-1.03) | 0.500 |
| rs12983082 | 19 | 11216561 | 0.55 | A | -0.0476 | 0.005 | 9.575E-19 | 1.01 (0.98-1.04) | 0.540 |
| rs5930     | 19 | 11224265 | 0.41 | A | -0.0649 | 0.005 | 2.615E-33 | 1.01 (0.98-1.04) | 0.606 |
| rs2738452  | 19 | 11229218 | 0.56 | A | -0.0589 | 0.005 | 1.649E-29 | 1.00 (0.96-1.03) | 0.778 |

|            |    |          |      |   |         |       |           |                  |       |
|------------|----|----------|------|---|---------|-------|-----------|------------------|-------|
| rs5927     | 19 | 11233941 | 0.22 | A | -0.0411 | 0.007 | 1.585E-10 | 0.96 (0.93-1.00) | 0.050 |
| rs6413504  | 19 | 11241915 | 0.52 | A | -0.0608 | 0.005 | 1.997E-28 | 1.00 (0.97-1.03) | 0.923 |
| rs4804147  | 19 | 11256285 | 0.54 | A | -0.0542 | 0.006 | 2.76E-21  | 0.99 (0.96-1.03) | 0.685 |
| rs892115   | 19 | 11263650 | 0.69 | T | -0.0340 | 0.007 | 3.4E-08   | 0.97 (0.93-1.00) | 0.065 |
| rs7188     | 19 | 11275139 | 0.72 | A | -0.0551 | 0.007 | 4.461E-16 | 0.99 (0.95-1.02) | 0.457 |
| rs11668104 | 19 | 19426181 | 0.15 | A | -0.0629 | 0.008 | 4.177E-15 | 1.02 (0.97-1.07) | 0.470 |
| rs10415849 | 19 | 19505087 | 0.12 | T | -0.0613 | 0.008 | 1.781E-15 | 1.02 (0.97-1.07) | 0.356 |
| rs16996148 | 19 | 19658472 | 0.08 | T | -0.0877 | 0.010 | 5.987E-21 | 1.02 (0.96-1.08) | 0.629 |
| rs12610185 | 19 | 19721722 | 0.11 | A | -0.0742 | 0.009 | 1.815E-16 | 1.01 (0.95-1.07) | 0.739 |
| rs17347726 | 19 | 44934842 | 0.16 | C | -0.0464 | 0.008 | 3.913E-08 | 0.99 (0.93-1.05) | 0.697 |
| rs17800760 | 19 | 45013959 | 0.18 | A | -0.0491 | 0.008 | 1.744E-11 | 0.96 (0.92-1.00) | 0.083 |
| rs17800819 | 19 | 45017064 | 0.14 | T | -0.0522 | 0.008 | 4.203E-11 | 0.95 (0.91-0.99) | 0.024 |
| rs2272020  | 19 | 45150433 | 0.07 | A | -0.1278 | 0.014 | 1.414E-21 | 0.90 (0.84-0.97) | 0.008 |
| rs1058402  | 19 | 45150614 | 0.07 | A | -0.1242 | 0.014 | 1.443E-22 | 0.88 (0.82-0.95) | 0.001 |
| rs2965109  | 19 | 45225345 | 0.37 | T | -0.0575 | 0.006 | 2.463E-26 | 0.84 (0.81-0.87) | 0.000 |
| rs1531517  | 19 | 45242173 | 0.06 | A | -0.2482 | 0.012 | 0         | 0.79 (0.74-0.84) | 0.000 |
| rs4803759  | 19 | 45327459 | 0.27 | T | -0.0676 | 0.006 | 1.933E-32 | 0.82 (0.79-0.85) | 0.000 |
| rs4803760  | 19 | 45333834 | 0.19 | T | -0.1263 | 0.007 | 0         | 0.91 (0.87-0.95) | 0.000 |
| rs7359852  | 19 | 45336035 | 0.64 | T | -0.0944 | 0.006 | 0         | 0.74 (0.72-0.77) | 0.000 |
| rs4605275  | 19 | 45338493 | 0.26 | T | -0.0718 | 0.006 | 3.357E-33 | 0.81 (0.78-0.84) | 0.000 |
| rs2972564  | 19 | 45344458 | 0.88 | A | -0.0771 | 0.011 | 1.263E-13 | 1.13 (1.08-1.19) | 0.000 |
| rs1985096  | 19 | 45346551 | 0.15 | A | -0.1553 | 0.009 | 0         | 0.91 (0.86-0.95) | 0.000 |
| rs4803766  | 19 | 45371168 | 0.43 | A | -0.0294 | 0.005 | 2.074E-08 | 0.97 (0.94-1.00) | 0.029 |
| rs8104483  | 19 | 45372354 | 0.71 | T | -0.0532 | 0.006 | 1.935E-20 | 1.05 (1.01-1.09) | 0.006 |
| rs395908   | 19 | 45373565 | 0.16 | A | -0.1512 | 0.007 | 0         | 1.00 (0.96-1.05) | 0.970 |
| rs283813   | 19 | 45389174 | 0.04 | A | -0.2464 | 0.017 | 0         | 1.36 (1.27-1.46) | 0.000 |
| rs7254892  | 19 | 45389596 | 0.03 | A | -0.4181 | 0.021 | 0         | 0.78 (0.70-0.87) | 0.000 |
| rs2075650  | 19 | 45395619 | 0.83 | A | -0.1883 | 0.009 | 0         | 0.35 (0.34-0.37) | 0.000 |

|            |    |          |      |   |         |       |           |                  |       |
|------------|----|----------|------|---|---------|-------|-----------|------------------|-------|
| rs8106922  | 19 | 45401666 | 0.60 | A | -0.0571 | 0.007 | 3.644E-17 | 1.46 (1.42-1.51) | 0.000 |
| rs445925   | 19 | 45415640 | 0.09 | A | -0.3603 | 0.024 | 0         | 1.02 (0.96-1.08) | 0.511 |
| rs4803770  | 19 | 45427353 |      | C | -0.1007 | 0.008 | 3.272E-29 | 0.63 (0.61-0.66) | 0.000 |
| rs5158     | 19 | 45447178 | 0.13 | T | -0.0651 | 0.010 | 2.564E-10 | 0.98 (0.93-1.03) | 0.463 |
| rs11672002 | 19 | 45624987 | 0.33 | T | -0.0442 | 0.005 | 5.981E-15 | 1.01 (0.97-1.04) | 0.661 |
| rs12975698 | 19 | 45676294 | 0.35 | C | -0.0489 | 0.006 | 1.437E-15 | 1.00 (0.96-1.04) | 0.976 |
| rs679574   | 19 | 49206108 | 0.44 | C | -0.0285 | 0.006 | 8.696E-08 | 1.02 (0.99-1.06) | 0.128 |
| rs492602   | 19 | 49206417 | 0.45 | A | -0.0282 | 0.006 | 7.573E-08 | 0.98 (0.94-1.01) | 0.123 |
| rs1000410  | 20 | 39634366 | 0.56 | C | -0.0287 | 0.005 | 2.946E-08 | 1.00 (0.97-1.03) | 0.994 |
| rs12625035 | 20 | 39664665 | 0.80 | T | -0.0371 | 0.007 | 1.007E-08 | 1.03 (0.99-1.07) | 0.164 |
| rs6016511  | 20 | 39709255 | 0.68 | T | -0.0463 | 0.005 | 7.871E-18 | 1.00 (0.97-1.04) | 0.900 |
| rs2076576  | 20 | 39713352 | 0.82 | A | -0.0387 | 0.007 | 2.935E-09 | 1.02 (0.98-1.06) | 0.288 |
| rs6129760  | 20 | 39746403 | 0.69 | A | -0.0467 | 0.005 | 3.909E-18 | 1.00 (0.97-1.03) | 0.990 |
| rs3795131  | 20 | 39769975 | 0.70 | T | -0.0441 | 0.006 | 5.5E-16   | 1.00 (0.97-1.03) | 0.949 |
| rs12624863 | 20 | 39782899 | 0.81 | A | -0.0324 | 0.006 | 5.792E-08 | 1.01 (0.97-1.05) | 0.522 |
| rs753381   | 20 | 39797465 | 0.46 | T | -0.0394 | 0.005 | 5.988E-15 | 0.99 (0.96-1.02) | 0.652 |
| rs6102309  | 20 | 39856080 | 0.71 | A | -0.0437 | 0.006 | 7.508E-16 | 1.00 (0.97-1.03) | 0.951 |
| rs6129784  | 20 | 39885529 | 0.79 | T | -0.0338 | 0.006 | 1.933E-08 | 1.01 (0.98-1.05) | 0.473 |
| rs6029609  | 20 | 39911385 | 0.53 | A | -0.0453 | 0.005 | 3.36E-19  | 0.99 (0.96-1.02) | 0.680 |
| rs2179372  | 20 | 39913632 | 0.47 | C | -0.0421 | 0.005 | 2.23E-16  | 0.99 (0.96-1.02) | 0.386 |
| rs4812488  | 20 | 39916160 | 0.60 | T | -0.0348 | 0.005 | 1.087E-11 | 1.00 (0.97-1.03) | 0.984 |
| rs6513714  | 20 | 39916401 | 0.61 | A | -0.0346 | 0.005 | 1.418E-11 | 1.00 (0.97-1.03) | 0.993 |
| rs4812492  | 20 | 39938122 | 0.45 | T | -0.0372 | 0.005 | 1.759E-13 | 0.99 (0.96-1.02) | 0.600 |
| rs4810312  | 20 | 39968707 | 0.59 | C | -0.0385 | 0.005 | 3.88E-14  | 1.00 (0.97-1.03) | 0.889 |
| rs6029638  | 20 | 39970307 | 0.73 | T | -0.0395 | 0.006 | 2.663E-12 | 1.01 (0.97-1.04) | 0.750 |
| rs6129820  | 20 | 39974316 | 0.75 | A | -0.0393 | 0.006 | 7.487E-12 | 1.00 (0.97-1.04) | 0.874 |

Chr=Chromosome, MAF 1000G CEU=minor allele frequency for the central European population (CEU) in the 1000 Genome database.

SE=Standard error.



### Supplementary Table 3

Prospective risk of Alzheimer's dementia, vascular dementia, any dementia, and Parkinson's disease as a function of *PCSK9*, *HMGCR* and combined alleles adjusted for age, sex and birth year.

| Alleles             | N total | Alzheimer's dementia |                  | Vascular dementia |                  | Any dementia     |                  | Parkinson's disease |                  |                  |
|---------------------|---------|----------------------|------------------|-------------------|------------------|------------------|------------------|---------------------|------------------|------------------|
|                     |         | N events             | HR               | N events          | HR               | N events         | HR               | N events            | HR               |                  |
| <b><i>PCSK9</i></b> | -1      | 6,557                | 66               | 1                 | 18               | 1                | 138              | 1                   | 33               | 1                |
|                     | 0       | 71,931               | 665              | 0.89 (0.69-1.15)  | 174              | 0.89 (0.54-1.46) | 1,467            | 0.96 (0.80-1.15)    | 383              | 0.99 (0.68-1.43) |
|                     | 1       | 27,396               | 266              | 0.93 (0.71-1.22)  | 62               | 0.81 (0.47-1.39) | 583              | 0.98 (0.81-1.19)    | 144              | 0.97 (0.65-1.43) |
|                     | 2-4     | 4,041                | 32               | 0.80 (0.52-1.22)  | 6                | 0.60 (0.24-1.52) | 69               | 0.85 (0.63-1.14)    | 17               | 0.76 (0.41-1.42) |
|                     |         |                      | P for trend=0.72 |                   | P for trend=0.22 |                  | P for trend=0.68 |                     | P for trend=0.47 |                  |
| <b><i>HMGCR</i></b> | 0       | 5,725                | 55               | 1                 | 19               | 1                | 116              | 1                   | 33               | 1                |
|                     | 1       | 38,750               | 349              | 0.94 (0.70-1.26)  | 99               | 0.70 (0.42-1.14) | 796              | 0.98 (0.80-1.19)    | 212              | 0.94 (0.64-1.38) |
|                     | 2       | 63,749               | 612              | 1.02 (0.77-1.36)  | 140              | 0.63 (0.39-1.02) | 1,323            | 1.00 (0.83-1.22)    | 322              | 0.88 (0.61-1.29) |
|                     |         |                      | P for trend=0.36 |                   | P for trend=0.10 |                  | P for trend=0.69 |                     | P for trend=0.40 |                  |
| <b>Combined</b>     | -1 to   | 6,383                | 57               | 1                 | 21               | 1                | 123              | 1                   | 31               | 1                |
|                     | 1       | 30,518               | 288              | 1.11 (0.83-1.49)  | 77               | 0.76 (0.47-1.25) | 641              | 1.15 (0.94-1.41)    | 183              | 1.20 (0.81-1.77) |
|                     | 2       | 51,790               | 485              | 1.11 (0.84-1.48)  | 124              | 0.74 (0.46-1.18) | 1,067            | 1.11 (0.91-1.35)    | 253              | 0.96 (0.65-1.42) |
|                     | 3       | 17,187               | 165              | 1.13 (0.83-1.54)  | 33               | 0.59 (0.34-1.03) | 364              | 1.15 (0.93-1.42)    | 88               | 1.03 (0.67-1.57) |
|                     | 4       | 2,346                | 21               | 1.07 (0.64-1.79)  | 3                | 0.41 (0.12-1.39) | 40               | 0.94 (0.65-1.36)    | 12               | 1.03 (0.51-2.06) |
|                     |         |                      | P for trend=0.69 |                   | P for trend=0.05 |                  | P for trend=0.97 |                     | P for trend=0.29 |                  |

Number of individuals may vary due to availability of genotypes. P-values are from tests for trend of hazard ratios across ordered alleles.  
N=number of individuals.

Supplementary Figure 1

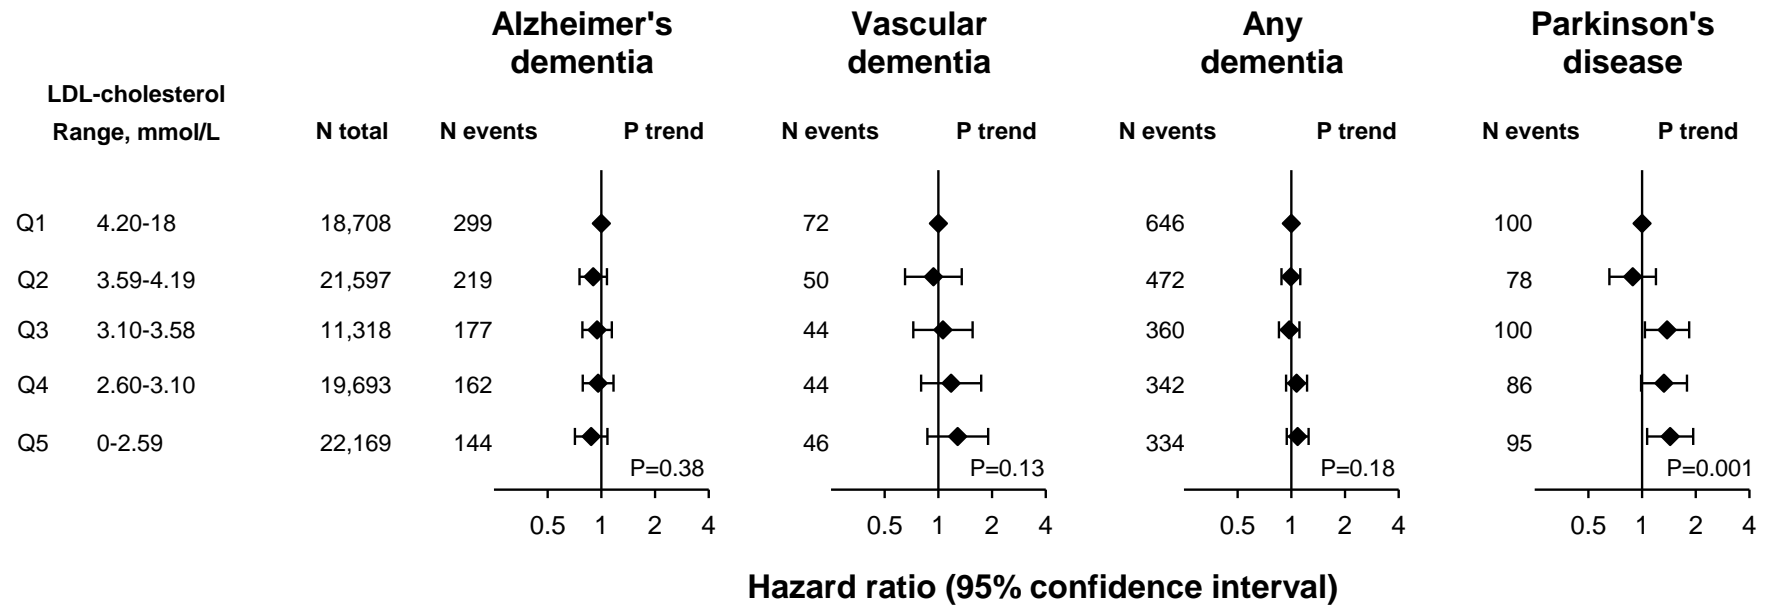

Prospective risk of Alzheimer's dementia, vascular dementia, any dementia, and Parkinson's disease as a function of baseline low-density-lipoprotein (LDL)-cholesterol in quintiles (Q1 through Q5). Multifactorially adjusted for age, sex, birth year, smoking as pack years, alcohol as units per week, physical inactivity, income, education, and menopause for women. Individuals with an event before baseline were excluded. P values are for test for trend of hazard ratios across ordered groups. N=number of individuals at risk.

Supplementary Figure 2

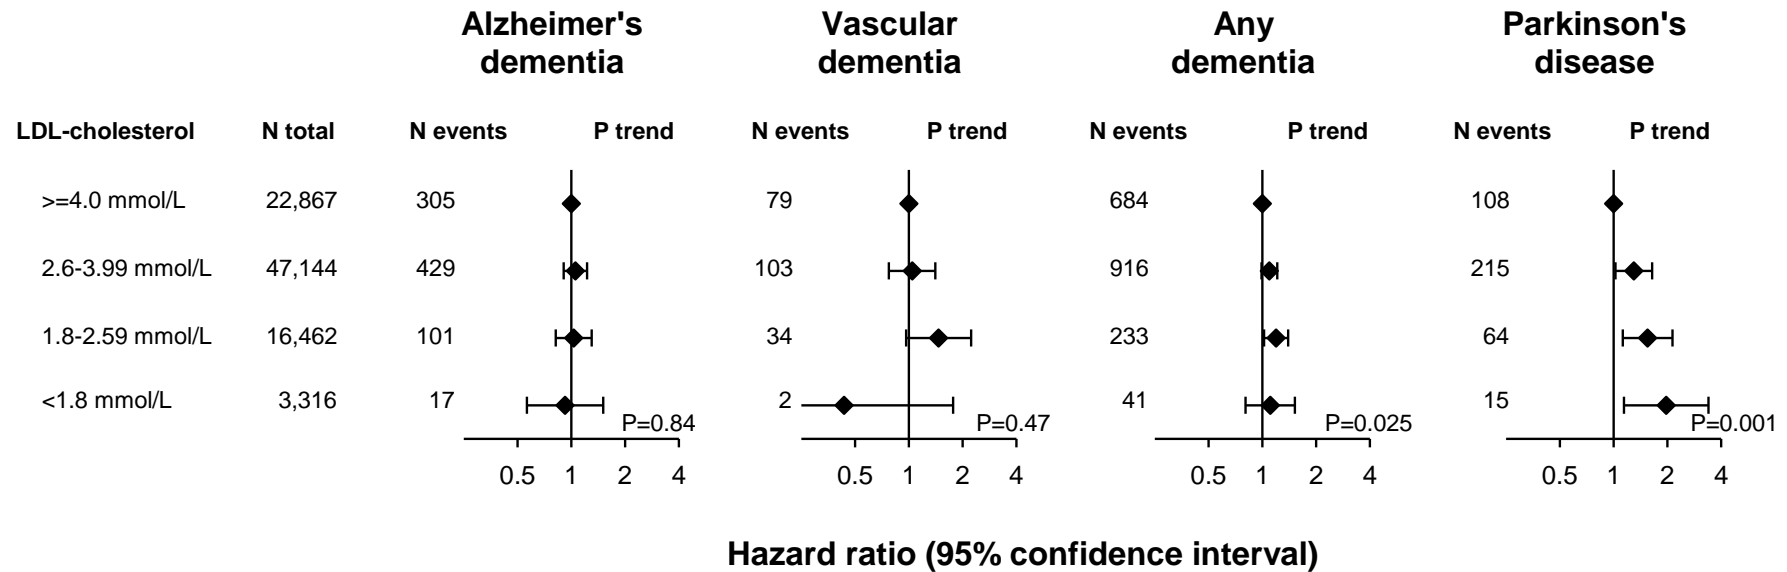

Prospective risk of Alzheimer’s dementia, vascular dementia, any dementia, and Parkinson’s disease as a function of baseline low-density-lipoprotein (LDL)-cholesterol in categories of LDL-cholesterol in individuals not on lipid lowering medication. Multifactorially adjusted for age, sex, birth year, smoking as pack years, alcohol as units per week, physical inactivity, income, education, and menopause for women. Individuals with an event before baseline were excluded. P values are for test for trend of hazard ratios across ordered groups. N=number of individuals at risk.

Supplementary Figure 3

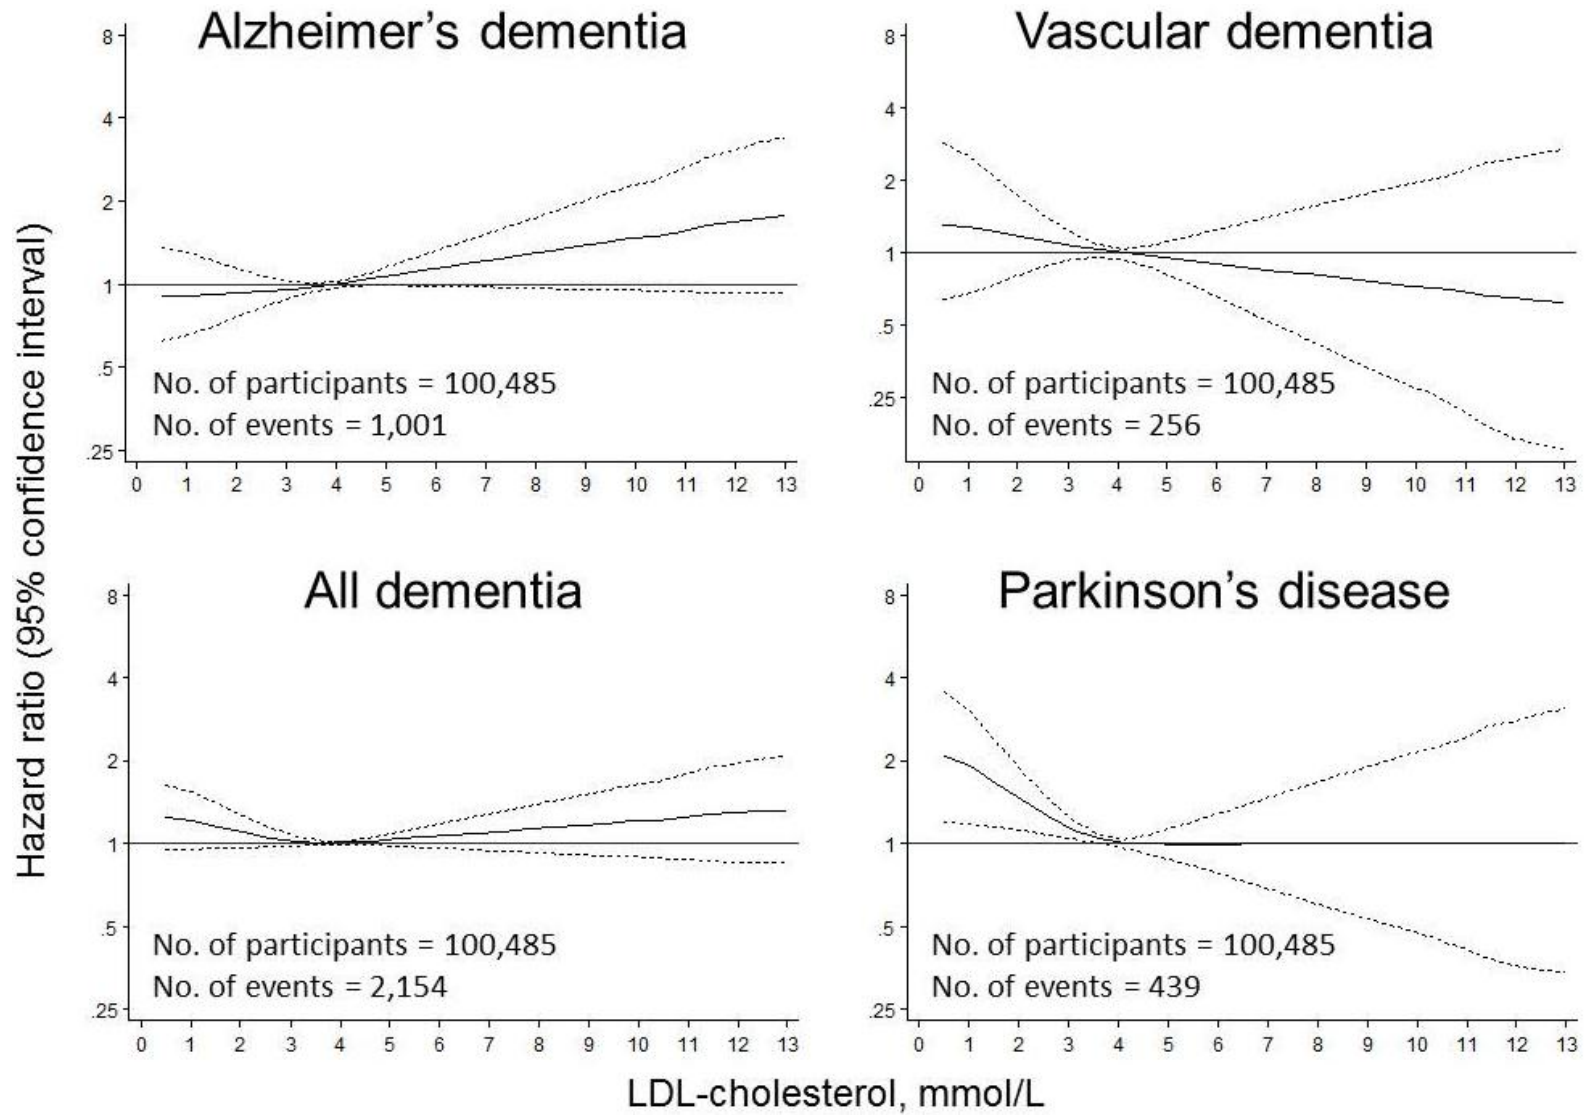

Multivariable adjusted hazard ratios for Alzheimer's dementia, vascular dementia, all dementia, and Parkinson's disease in the general population, the Copenhagen General Population Study and the Copenhagen City Heart Study. Solid lines are multivariable adjusted hazard ratios, and dashed lines indicate 95% confidence intervals derived from restricted cubic spline regression with knots chosen by Akaike information criterion. The number of knots, between 3 and 7, was chosen according to two criteria to balance best fit and overfitting: 1) best fit; lowest value of Akaike information criteria (Akaike H. Information theory and an extension of the maximum likelihood principle. In: Parzen E, Tanabe K, Kitagawa G, eds. Selected papers of Hirotugu Akaike. New York, NY: Springer; 1998\_199-213) and 2) parsimony; if Akaike information criteria were within two of each other for different knots, the lowest number was chosen.

**Supplementary Figure 4**

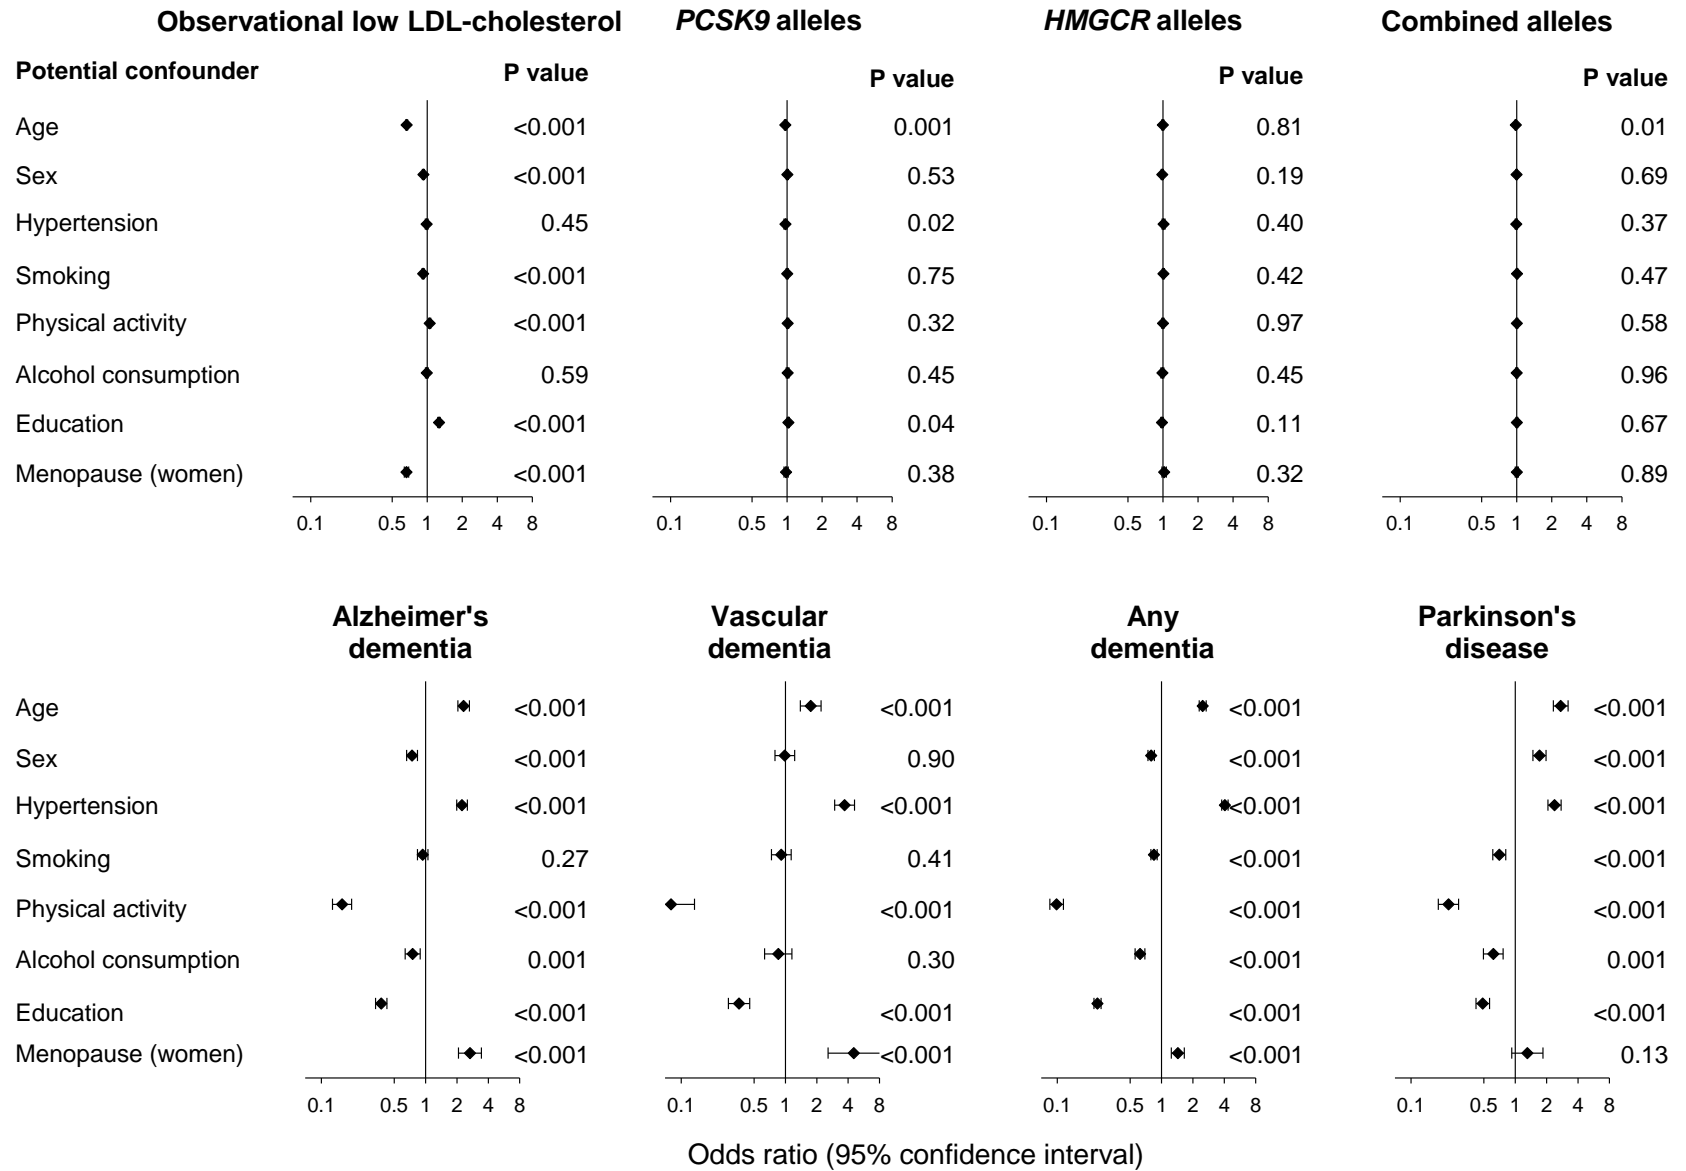

Associations of potential confounders with low low-density-lipoprotein (LDL)-cholesterol, alleles, Alzheimer's disease, vascular dementia, any dementia, and Parkinson's disease. Potential confounders were dichotomized: age ( $\geq 55$  years versus  $< 55$  years), sex (men versus women), hypertension (yes versus no), smoking (smoking versus non-smoking), physical activity (intermediate and high versus low), alcohol consumption ( $> 14/21$  versus  $\leq 14/21$  units per week for women/men), education ( $\geq 10$  years versus  $< 10$  years education), and for women menopausal status (postmenopausal versus premenopausal). For each potential confounder, logistic regression analysis was used to calculate age and sex-adjusted odds ratios and p-values for, respectively, a 1 mmol/L lower LDL-cholesterol, a 1 unit increase in allele score, and for presence versus absence of disease. Correcting for multiple testing using the Bonferroni method, would change the level of statistical significance to  $0.05/8=0.006$ .



Supplementary Figure 5

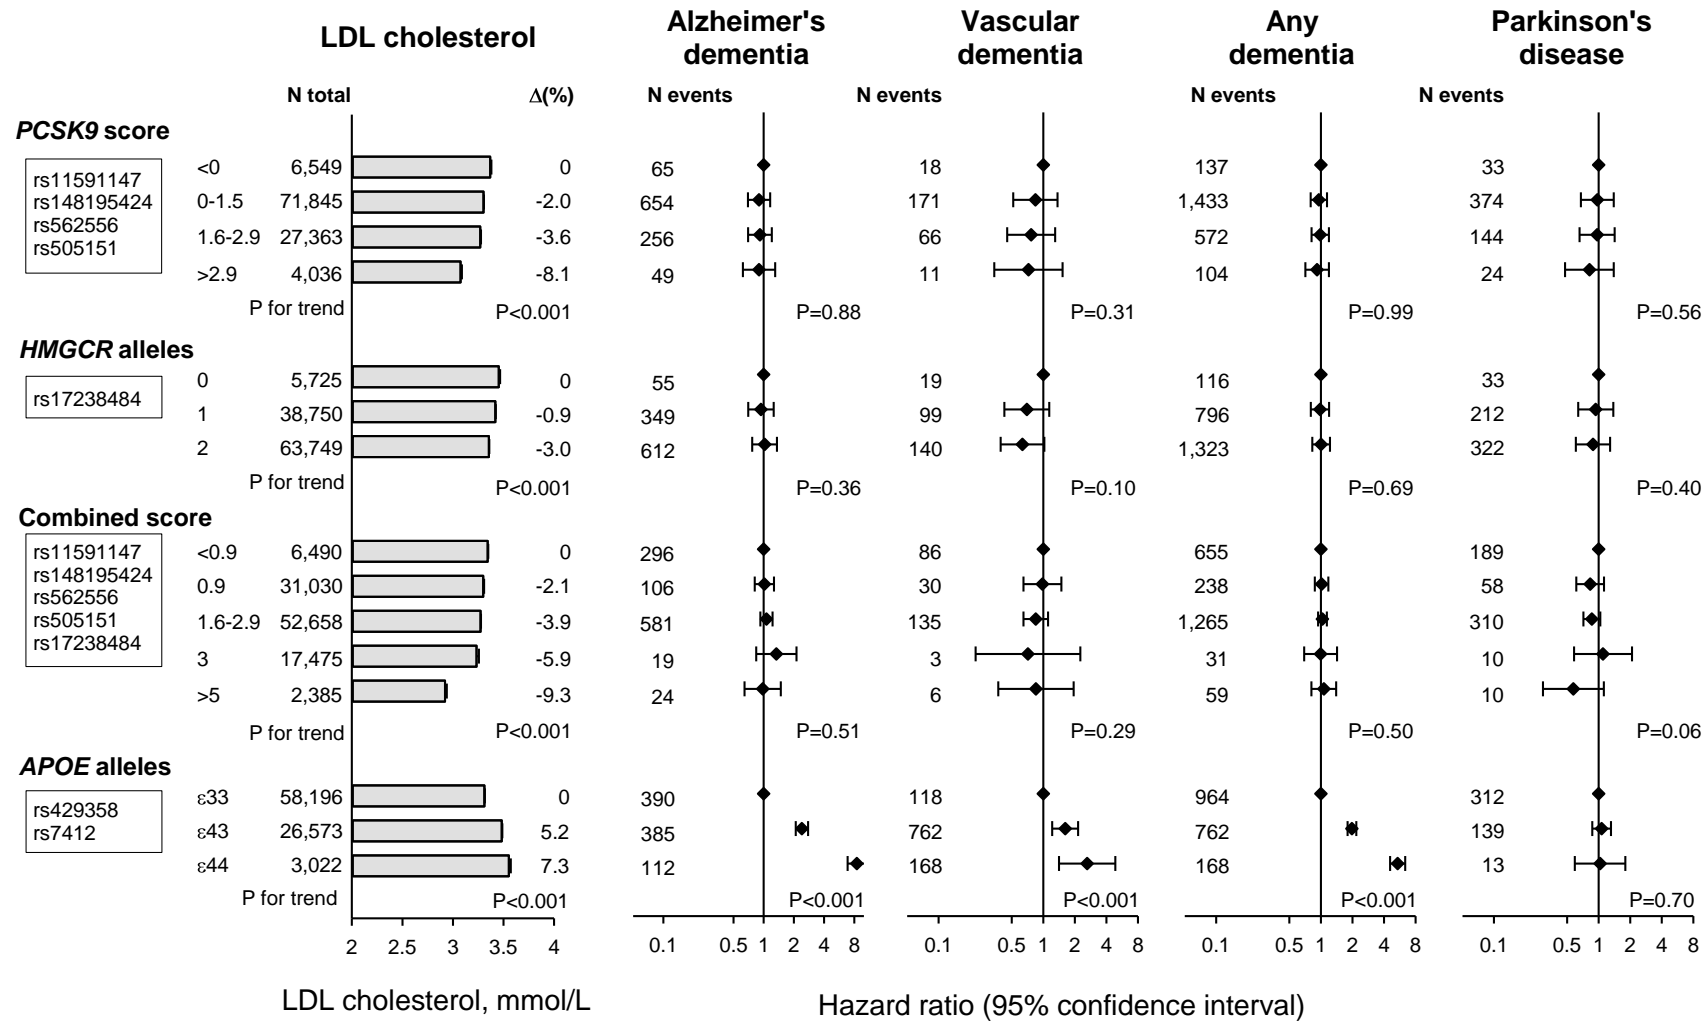

Prospective risk of Alzheimer's dementia, vascular dementia, any dementia, and Parkinson's disease as a function of weighted *PCSK9* and combined allele scores and simple *HMGCR* and *APOE* genotypes adjusted for age, sex and birth year. Number of individuals may vary due to availability of genotypes. P-values are from tests for trend of hazard ratios across ordered alleles. N=number of individuals.

Supplementary Figure 6

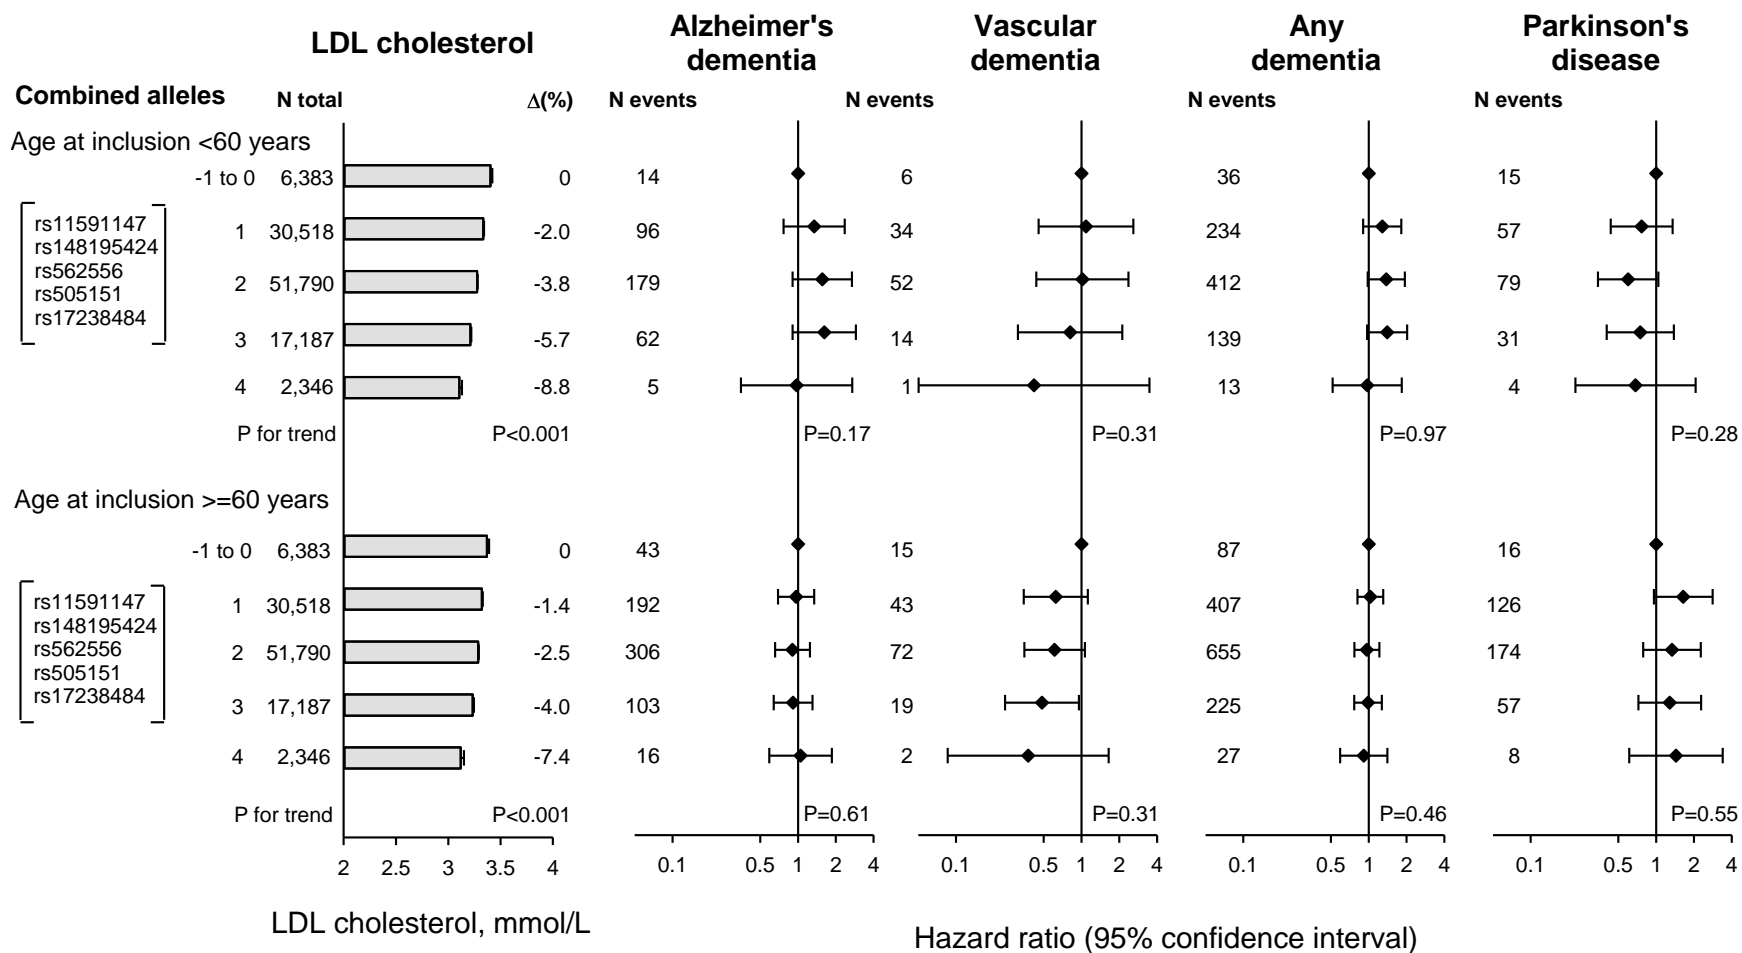

Prospective risk of Alzheimer's dementia, vascular dementia, any dementia, and Parkinson's disease as a function of combined LDL-cholesterol lowering alleles adjusted for age, sex and birth year and in strata by age below 60 years and above. Number of individuals may vary due to availability of genotypes. P-values are from tests for trend of hazard ratios across ordered alleles. N=number of individuals.

Supplementary Figure 7

Funnel plot of iGAP genetic variants

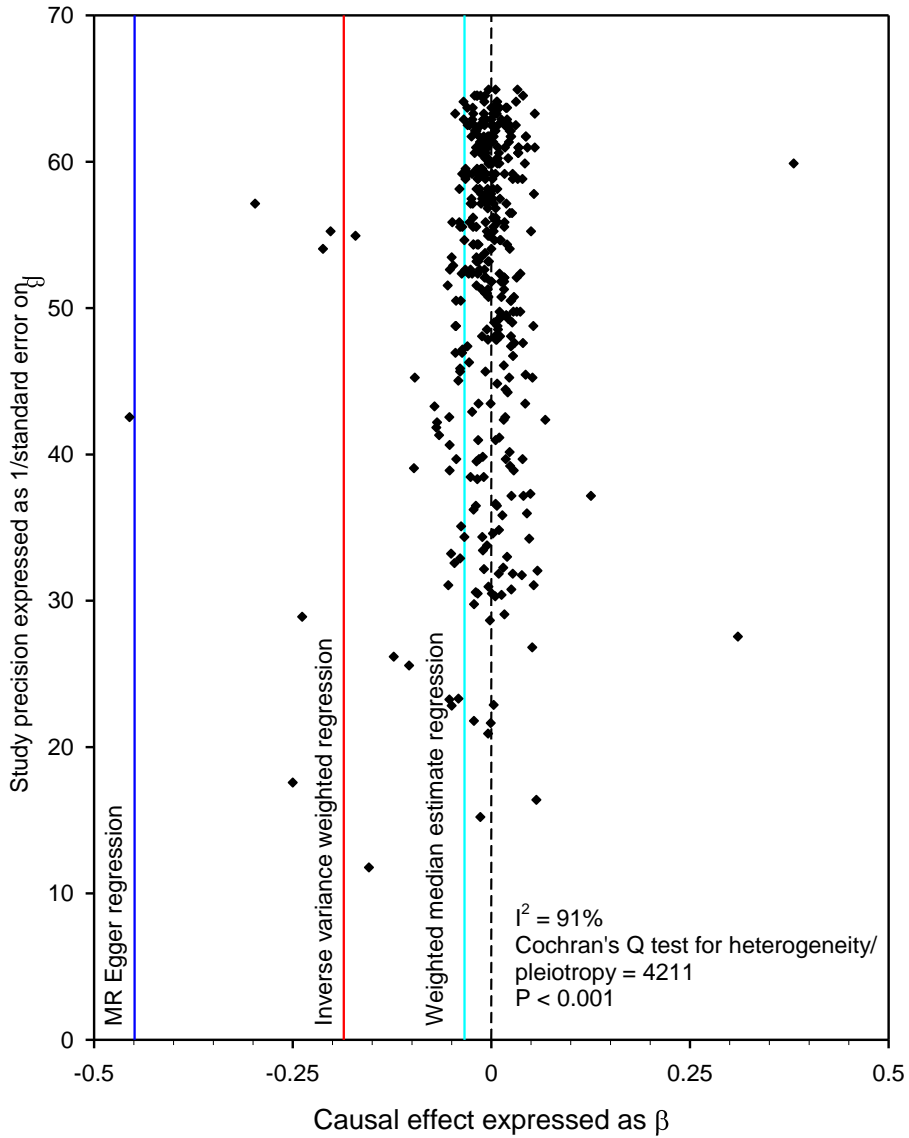

Funnel plot of study precision expressed as 1 divided by the standard error on the estimate ( $\beta$ ) and plotted against causal estimates based on each genetic variant individually. Cochran's Q statistics tested for directional pleiotropy by summing the squared deviations of each genetic variants estimate from the overall estimate<sup>1</sup>. Colored vertical lines denote the causal effect estimate from MR-Egger regression (dark blue), inverse variance weighted (red), and weighted median estimate regression (light blue).

On visual inspection data points are largely symmetrically distributed around the broken reference line, but with some variants with a low precision (low Y, corresponding to a high standard error on  $\beta$ ) with an effect on the causal estimate, indicative of presence of a slight directional pleiotropy.

## Supplementary Figure 8

### Plot of gene-outcome vs. gene-exposure associations

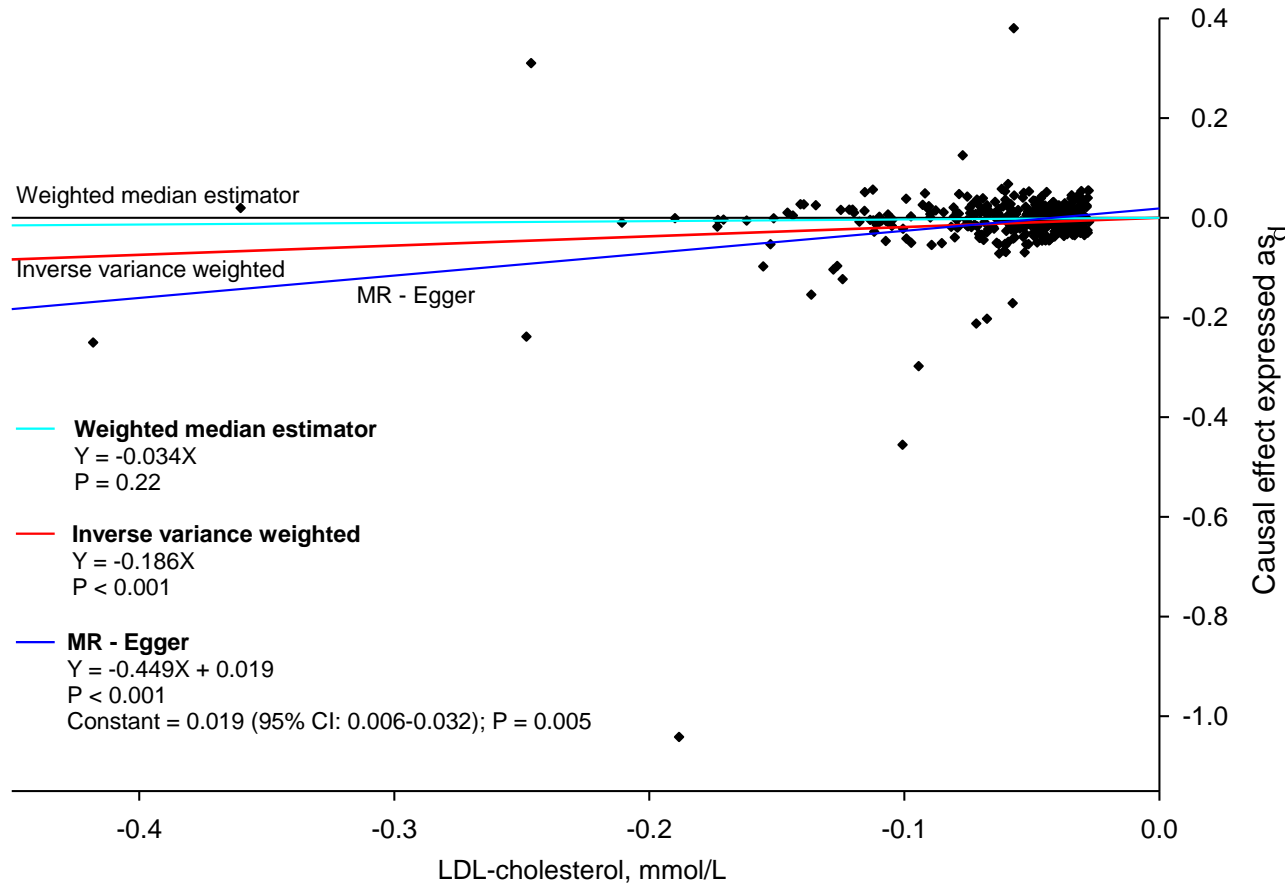

Scatterplot of the causal effect of each genetic variant against the effect on LDL-cholesterol. Colored regression lines denote the causal effect estimate from MR-Egger regression (dark blue), inverse variance weighted (red), and weighted median estimate regression (light blue). The estimated value of the intercept in MR-Egger regression is 0.019 (95% confidence interval (CI): 0.006-0.032;  $P=0.005$ ), indicative of a modest overall directional pleiotropy. MR=Mendelian randomization.

## Appendix A

### Global Lipid Genetics Consortium<sup>2</sup>

Global Lipid Genetics Consortium is a consortium combining 25 genome wide association studies on lipid phenotypes. The consortium comprises approximately 2.6 mio SNPs genotyped on the Illumina “Metabochip” on 95,454 individuals. For the present study, data on genetic variants associated with LDL-cholesterol was used. Detailed information on Global Lipid Genetics Consortium is found on the study Web site

<http://www.nature.com/ng/journal/v45/n11/extref/ng.2797-S1.pdf>

### International Genomics of Alzheimer’s Project (IGAP)<sup>3</sup>

The International Genomics of Alzheimer's Project (IGAP) includes results from the 2013 meta-analysis of genome-wide association data on Alzheimer's disease with p-values and direction of effect at 7,055,881 directly genotyped or imputed genetic variants (1000G phase 1 alpha imputation, Build 37, Assembly Hg19) of 17,008 Alzheimer's disease cases and 37,154 controls.

#### *Material and methods*

International Genomics of Alzheimer's Project (IGAP) is a large two-stage study based upon genome-wide association studies (GWAS) on individuals of European ancestry. In stage 1, IGAP used genotyped and imputed data on 7,055,881 single nucleotide polymorphisms (SNPs) to meta-analyse four previously-published GWAS datasets consisting of 17,008 Alzheimer's disease cases and 37,154 controls (The European Alzheimer's disease Initiative – EADI the Alzheimer Disease Genetics Consortium – ADGC The Cohorts for Heart and Aging Research in Genomic Epidemiology consortium – CHARGE The Genetic and Environmental Risk in AD consortium – GERAD). In stage 2, 11,632 SNPs were genotyped and tested for association in an independent set of 8,572 Alzheimer's disease cases and 11,312 controls. Finally, a meta-analysis was performed combining results from stages 1 & 2.

For further information on IGAP, please refer to [http://web.pasteur-lille.fr/en/recherche/u744/igap/igap\\_download.php](http://web.pasteur-lille.fr/en/recherche/u744/igap/igap_download.php)

#### *Acknowledgments*

We thank the International Genomics of Alzheimer's Project (IGAP) for providing summary results data for these analyses. The investigators within IGAP contributed to the design and implementation of IGAP and/or provided data but did not participate in analysis or writing of this report. IGAP was made possible by the generous participation of the control subjects, the patients, and their families. The i-Select chips was funded by the French National Foundation on Alzheimer's disease and related disorders. EADI was supported by the LABEX (laboratory of excellence program investment for the future) DISTALZ grant, Inserm, Institut Pasteur de Lille, Université de Lille 2 and the Lille University Hospital. GERAD was supported by the Medical Research Council (Grant n° 503480), Alzheimer's Research UK (Grant n° 503176), the Wellcome Trust (Grant n° 082604/2/07/Z) and German Federal Ministry of Education and Research (BMBF):

Competence Network Dementia (CND) grant n° 01GI0102, 01GI0711, 01GI0420. CHARGE was partly supported by the NIH/NIA grant R01 AG033193 and the NIA AG081220 and AGES contract N01-AG-12100, the NHLBI grant R01 HL105756, the Icelandic Heart Association, and the Erasmus Medical Center and Erasmus University. ADGC was supported by the NIH/NIA grants: U01 AG032984, U24 AG021886, U01 AG016976, and the Alzheimer's Association grant ADGC-10-196728.

## References

### Reference List

- (1) Bowden J, Davey SG, Burgess S. Mendelian randomization with invalid instruments: effect estimation and bias detection through Egger regression. *Int J Epidemiol* 2015; 44(2):512-525.
- (2) Willer CJ, Schmidt EM, Sengupta S, Peloso GM, Gustafsson S, Kanoni S et al. Discovery and refinement of loci associated with lipid levels. *Nat Genet* 2013; 45(11):1274-1283.
- (3) Lambert JC, Ibrahim-Verbaas CA, Harold D, Naj AC, Sims R, Bellenguez C et al. Meta-analysis of 74,046 individuals identifies 11 new susceptibility loci for Alzheimer's disease. *Nat Genet* 2013; 45(12):1452-1458.
