# Supplementary figures and images for: Low LDL cholesterol, PCSK9 and HMGCR genetic variation, and risk of Alzheimer’s disease and Parkinson’s disease: Mendelian randomisation study
Source: PubMed Central journal article supplement — BMJ. 2017 Apr 24;357:j1648. doi: 10.1136/bmj.j1648 (PMC5421439; doi:10.1136/bmj.j1648), 2017-04-24

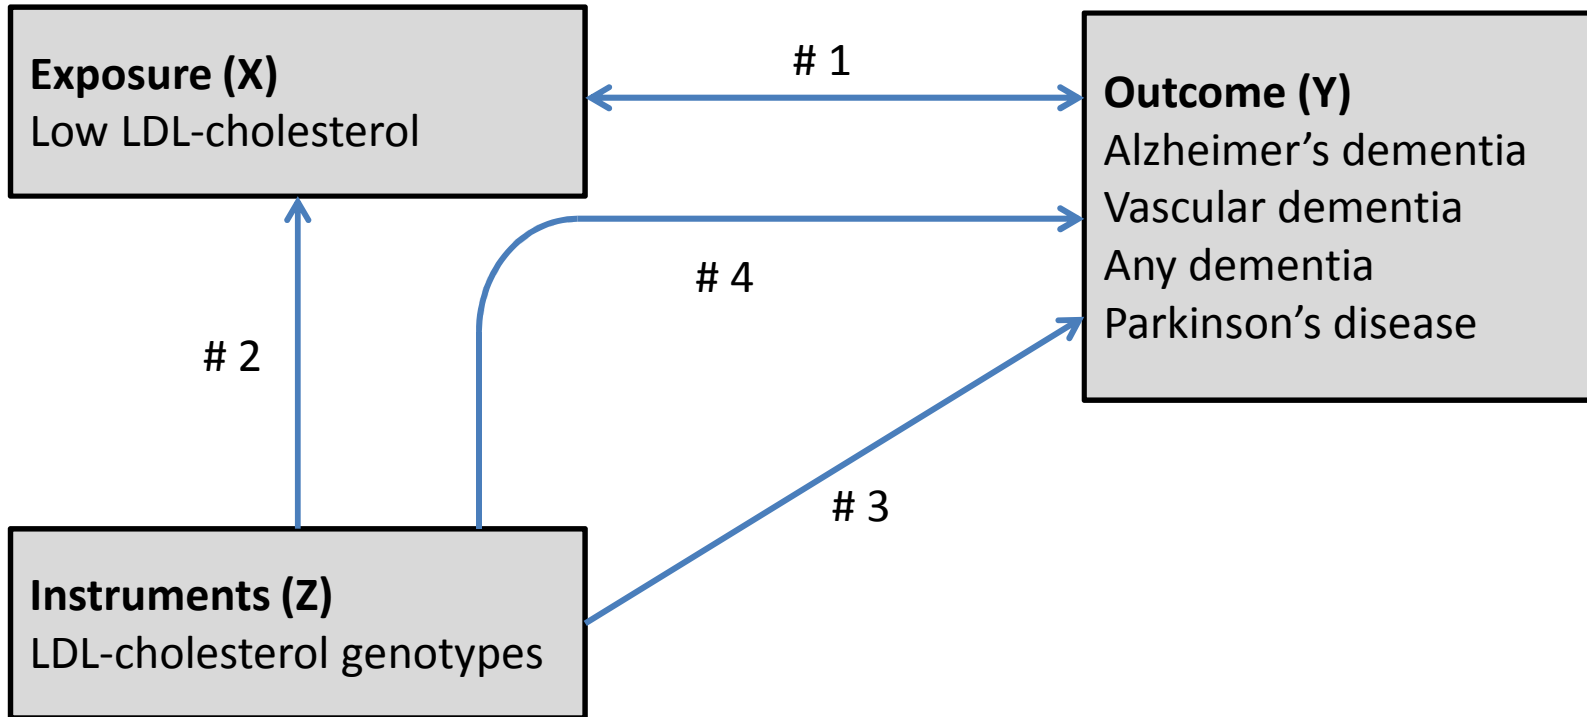

Supplement: benm033277.wf1.pdf [file benm033277.wf1.pdf]
